# Supplementary material for: Three-dimensional 14-core manganese-sodium-based polyoxometalate with unique channels as bifunctional electrocatalysts for overall water splitting
Source: Royal Society of Chemistry journal article supplement (doi:10.1039/d4ce00945b), 2025-01-01
Supplement: d4ce00945b1.pdf [file d4ce00945b1.pdf]

## **Supporting Information**

# **Three-Dimensional 14-Core Manganese-sodium based Polyoxometalate with unique Channels as bifunctional electrocatalysts for overall water splitting**

# Table of Contents

|          |                                                                                            |           |
|----------|--------------------------------------------------------------------------------------------|-----------|
| <b>1</b> | <b>Experimental Procedures.....</b>                                                        | <b>3</b>  |
| 1.1      | Reagents and materials .....                                                               | 3         |
| 1.2      | Electrode preparation .....                                                                | 3         |
| 1.3      | Experimental procedure diagrams and tables.....                                            | 3         |
| 1.4      | Elemental percentage calculations .....                                                    | 4         |
| <b>2</b> | <b>Results and Discussion .....</b>                                                        | <b>5</b>  |
| 2.1      | Lengths and Angles Table .....                                                             | 5         |
| 2.2      | The structural diagrams of compounds 1-2 .....                                             | 10        |
| 2.3      | The characterization diagrams of compounds 1-2 .....                                       | 17        |
| 2.4      | BET of Compound 1 and Compound 2 .....                                                     | 22        |
| 2.5      | HER experiments of Compound 1 and Compound 2 in 0.5 M H <sub>2</sub> SO <sub>4</sub> ..... | 24        |
| 2.6      | OER experiments of Compound 1 and Compound 2 in 0.5 M KOH.....                             | 34        |
| 2.7      | Summary of HER and OER performance for the work in this paper .....                        | 43        |
| 2.8      | Determination of Turn Over Frequency (TOF) .....                                           | 45        |
| <b>3</b> | <b>REFERENCES .....</b>                                                                    | <b>47</b> |

# 1 Experimental Procedures

## 1.1 Reagents and materials

All reagents were purchased from Shanghai Aladdin Biochemical Technology Co., Ltd.,  $\geq 99\%$ (purity), on page 5-6 of the manuscript.

## 1.2 Electrode preparation

The carbon cloth was  $1 \times 1.5 \text{ cm}^2$  and was washed three times with  $0.5 \text{ M H}_2\text{SO}_4$ /deionized water and dried. The compound was fully ground into a powder and ground with acetylene black (Compound: Acetylene black =3:1).  $5.0 \text{ mg}$  mixture was fully mixed and dispersed in  $200 \mu\text{L}$  solution (ethanol: water =3:1) and sonicated for 30 minutes. The dispersed slurry ( $5 \mu\text{L}$ ) was dripped onto the carbon cloth electrode to form a uniform film at room temperature for 2 hours. Then the Nafion solution ( $5 \mu\text{L}$ ) was dripped on the electrode surface as a protective film and was dried for 1 hours.

## 1.3 Experimental procedure diagrams and tables

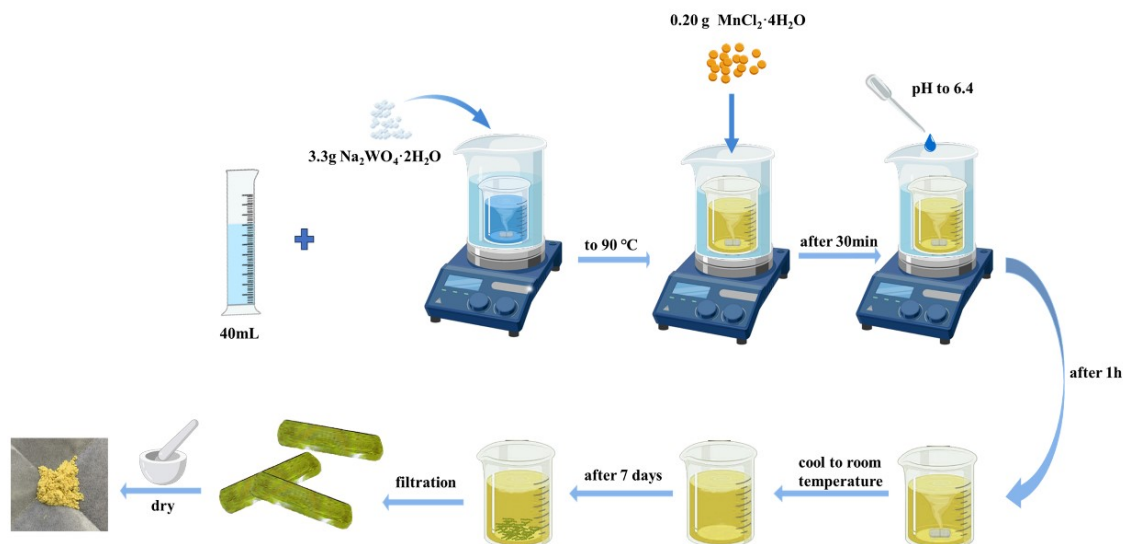

Figure S1 The synthetic process of Compound 1

**Table S1 The synthetic conditions for Compounds 1-2**

|    | Na <sub>2</sub> WO <sub>4</sub> ·2H <sub>2</sub> O | MnCl <sub>2</sub> ·4H <sub>2</sub> O | C <sub>7</sub> H <sub>10</sub> N <sub>2</sub> | pH  | reaction temperature | Solution volume | crystal    |
|----|----------------------------------------------------|--------------------------------------|-----------------------------------------------|-----|----------------------|-----------------|------------|
| 1  | 10mmol                                             | 0.1mmol                              |                                               | 6.4 | 90°C                 | 40 mL           | No         |
| 2  | 10mmol                                             | 0.5mmol                              |                                               | 6.4 | 90°C                 | 40 mL           | No         |
| 3  | 10mmol                                             | 1mmol                                |                                               | 6.4 | 90°C                 | 40 mL           | Compound 1 |
| 4  | 10mmol                                             | 2mmol                                |                                               | 6.4 | 90°C                 | 40 mL           | No         |
| 5  | 10mmol                                             | 3mmol                                |                                               | 6.4 | 90°C                 | 40 mL           | No         |
| 6  | 10mmol                                             | 1mmol                                |                                               | 5.4 | 90°C                 | 40 mL           | No         |
| 7  | 10mmol                                             | 1mmol                                |                                               | 5.8 | 90°C                 | 40 mL           | No         |
| 8  | 10mmol                                             | 1mmol                                |                                               | 6.7 | 90°C                 | 40 mL           | No         |
| 9  | 10mmol                                             | 1mmol                                |                                               | 6.4 | 80°C                 | 40 mL           | No         |
| 10 | 10mmol                                             | 1mmol                                |                                               | 6.4 | 100°C                | 40 mL           | No         |
| 11 | 10mmol                                             | 1mmol                                |                                               | 6.4 |                      | 20 mL           | No         |
| 12 | 10mmol                                             | 1mmol                                |                                               | 6.4 |                      | 30 mL           | No         |
| 13 | 10mmol                                             | 1mmol                                |                                               | 6.4 |                      | 50 mL           | No         |
| 14 | 10mmol                                             | 1mmol                                |                                               | 6.4 |                      | 60 mL           | No         |
| 15 | 10mmol                                             |                                      | 0.1mmol                                       | 6.7 | 90°C                 | 40 mL           | No         |
| 16 | 10mmol                                             |                                      | 0.5mmol                                       | 6.7 | 90°C                 | 40 mL           | No         |
| 17 | 10mmol                                             |                                      | 1mmol                                         | 6.7 | 90°C                 | 40 mL           | Compound 2 |
| 18 | 10mmol                                             |                                      | 2mmol                                         | 6.7 | 90°C                 | 40 mL           | No         |
| 19 | 10mmol                                             |                                      | 3mmol                                         | 6.7 | 90°C                 | 40 mL           | No         |
| 20 | 10mmol                                             |                                      | 1mmol                                         | 5.8 | 90°C                 | 40 mL           | No         |
| 21 | 10mmol                                             |                                      | 1mmol                                         | 6.4 | 90°C                 | 40 mL           | No         |
| 22 | 10mmol                                             |                                      | 1mmol                                         | 7.0 | 90°C                 | 40 mL           | No         |
| 23 | 10mmol                                             |                                      | 1mmol                                         | 6.7 | 80°C                 | 40 mL           | No         |
| 24 | 10mmol                                             |                                      | 1mmol                                         | 6.7 | 100°C                | 40 mL           | No         |
| 25 | 10mmol                                             |                                      | 1mmol                                         | 6.7 | 90°C                 | 20 mL           | No         |
| 26 | 10mmol                                             |                                      | 1mmol                                         | 6.7 | 90°C                 | 30 mL           | No         |
| 27 | 10mmol                                             |                                      | 1mmol                                         | 6.7 | 90°C                 | 50 mL           | No         |
| 28 | 10mmol                                             |                                      | 1mmol                                         | 6.7 | 90°C                 | 60 mL           | No         |

**1.4 Elemental percentage calculations****Table S2 The specific elemental analysis of Compounds 1-2**

| Compound          | m(g)   | V <sub>0</sub> (mL) | element | C <sub>0</sub> (mg/L) | C <sub>x</sub> (mg/kg) | W(%)   | At(%)  | atoms ratio |
|-------------------|--------|---------------------|---------|-----------------------|------------------------|--------|--------|-------------|
| <b>Compound 1</b> | 0.1210 | 100                 | Na      | 89.56                 | 74016.53               | 7.40%  | 3.22%  | 12.11       |
|                   | 0.1210 | 100                 | Mn      | 35.01                 | 28933.88               | 2.89%  | 0.525% | 1.97        |
|                   | 0.1210 | 100                 | W       | 721.11                | 595958.68              | 59.60% | 3.24%  | 12.18       |
|                   | 0.1210 | 100                 | O       | 346.12                | 286049.59              | 28.60% | 17.88% | 67.22       |

|                   |        |     |   |        |           |        |        |       |
|-------------------|--------|-----|---|--------|-----------|--------|--------|-------|
| <b>Compound 2</b> | 0.1385 | 100 | W | 840.23 | 606664.26 | 60.67% | 3.30%  | 12.00 |
|                   | 0.1385 | 100 | O | 261.24 | 188620.94 | 18.86% | 11.79% | 42.87 |
|                   | 0.1385 | 100 | C | 192.22 | 138787.00 | 13.88% | 11.57% | 42.07 |
|                   | 0.1385 | 100 | N | 63.56  | 45891.70  | 4.59%  | 3.28%  | 11.93 |

CN analysis was conducted using Thermo Scientific FLASH 2000 HT analyzer and ICP-OES analysis was performed using PerkinElmer optima 5300 DV ICP-OES.

$$C_x = \frac{C_0 * V_0}{m * 10^{-3}}$$

$$W(\%) = \frac{C_x}{10^6} * 100\%$$

$$A_t(\%) = \frac{W(\%)}{M}$$

m is the mass of the compound.

$V_0$  is the volume in a fixed volume

$C_0$  is the concentration of the element in the solution.

$C_x$  is the unit mass of the elements in the compound.

W (%) is the weight percentage.

At (%) is the percentage of atoms.

## 2 Results and Discussion

### 2.1 Lengths and Angles Table

**Table S3 Selected bond lengths (Å) and angles for Compound 1**

|            |           |             |           |            |           |
|------------|-----------|-------------|-----------|------------|-----------|
| W(1)-O(1)  | 2.098(9)  | W(1)-O(2)   | 2.261(9)  | W(1)-O(8)  | 1.812(9)  |
| W(1)-O(10) | 1.719(9)  | W(1)-O(12)  | 1.927(9)  | W(1)-O(19) | 1.926(9)  |
| W(2)-O(1)  | 1.846(9)  | W(2)-O(2)   | 2.238(9)  | W(2)-O(6)  | 1.920(9)  |
| W(2)-O(11) | 1.970(10) | W(2)-O(15)  | 1.735(9)  | W(2)-O(16) | 1.874(10) |
| W(3)-O(13) | 1.906(9)  | W(3)-O(14)  | 2.304(10) | W(3)-O(17) | 1.916(9)  |
| W(3)-O(18) | 1.751(9)  | W(3)-O(19)  | 2.216(9)  | W(3)-O(20) | 1.739(11) |
| W(4)-O(4)  | 1.762(9)  | W(4)-O(6)   | 1.893(9)  | W(4)-O(7)  | 2.218(9)  |
| W(4)-O(9)  | 1.745(11) | W(4)-O(17)  | 1.959(9)  | W(4)-O(19) | 2.187(9)  |
| W(5)-O(3)  | 1.748(9)  | W(5)-O(5)   | 1.731(9)  | W(5)-O(8)  | 2.183(9)  |
| W(5)-O(11) | 1.847(10) | W(5)-O(13)  | 1.984(10) | W(5)-O(14) | 2.220(9)  |
| W(6)-O(2)  | 2.266(9)  | W(6)-O(7)   | 1.803(9)  | W(6)-O(12) | 1.987(9)  |
| W(6)-O(14) | 1.888(9)  | W(6)-O(16)  | 2.064(10) | W(6)-O(21) | 1.721(9)  |
| O(1)-Na(4) | 2.969(15) | O(2)-W(6)   | 2.266(9)  | O(3)-Mn(1) | 2.426(9)  |
| O(3)-Na(6) | 2.463(11) | O(4)-Na(5)  | 2.916(14) | O(5)-Mn(1) | 2.386(10) |
| O(8)-W(5)  | 2.183(9)  | O(10)-Na(1) | 2.415(10) | O(12)-W(6) | 1.987(9)  |

|                   |           |                   |           |                   |           |
|-------------------|-----------|-------------------|-----------|-------------------|-----------|
| O(13)-W(5)        | 1.984(10) | O(14)-W(5)        | 2.220(9)  | O(15)-Na(6)       | 2.393(10) |
| O(16)-W(6)        | 2.064(10) | O(20)-Na(3)       | 2.865(15) | O(21)-Mn(1)       | 2.447(9)  |
| Mn(1)-O(3)        | 2.426(9)  | Mn(1)-O(5)        | 2.386(10) | Mn(1)-O(22)       | 2.409(10) |
| Mn(1)-O(23)       | 2.398(10) | Mn(1)-O(24)       | 2.388(11) | Mn(1)-O(25)       | 2.381(11) |
| O(24)-Na(4)       | 2.818(16) | O(25)-Na(6)       | 2.347(12) | Na(1)-O(26)       | 2.347(11) |
| Na(1)-O(28)       | 2.389(12) | Na(1)-O(29)       | 2.389(12) | Na(1)-O(30)       | 2.515(12) |
| Na(1)-O(27)       | 2.352(12) | O(26)-Na(6)       | 2.389(10) | O(28)-Na(6)       | 2.337(12) |
| O(29)-Na(2)       | 2.448(12) | O(29)-Na(3)       | 2.814(15) | O(30)-Na(5)       | 2.762(15) |
| Na(2)-O(31)       | 2.377(12) | Na(2)-O(32)       | 2.457(12) | Na(2)-O(33)       | 2.612(12) |
| Na(2)-O(27)       | 2.328(12) | O(32)-Na(2)       | 2.457(12) | O(32)-Na(4)       | 2.806(16) |
| O(33)-Na(3)       | 2.789(16) | Na(4)-O(1)        | 2.969(15) | Na(4)-O(24)       | 2.818(16) |
| Na(4)-O(27)       | 2.850(16) | Na(5)-O(4)        | 2.916(14) | Na(6)-O(3)        | 2.463(11) |
| Na(6)-O(15)       | 2.393(10) | Na(6)-O(26)       | 2.389(10) | Na(6)-O(28)       | 2.337(12) |
| O(1)-W(1)-O(2)    | 72.0(4)   | O(8)-W(1)-O(1)    | 161.1(4)  | O(8)-W(1)-O(2)    | 89.1(4)   |
| O(8)-W(1)-O(12)   | 92.5(4)   | O(8)-W(1)-O(19)   | 94.0(4)   | O(10)-W(1)-O(1)   | 95.6(4)   |
| O(10)-W(1)-O(2)   | 165.4(4)  | O(10)-W(1)-O(8)   | 103.3(4)  | O(10)-W(1)-O(12)  | 99.8(4)   |
| O(10)-W(1)-O(19)  | 101.3(4)  | O(12)-W(1)-O(1)   | 82.4(4)   | O(12)-W(1)-O(2)   | 71.6(3)   |
| O(19)-W(1)-O(1)   | 84.0(4)   | O(19)-W(1)-O(2)   | 85.3(4)   | O(19)-W(1)-O(12)  | 155.9(4)  |
| O(1)-W(2)-O(2)    | 77.2(4)   | O(1)-W(2)-O(6)    | 88.4(4)   | O(1)-W(2)-O(11)   | 156.6(4)  |
| O(1)-W(2)-O(16)   | 90.7(4)   | O(6)-W(2)-O(2)    | 80.7(4)   | O(6)-W(2)-O(11)   | 85.0(4)   |
| O(11)-W(2)-O(2)   | 79.6(4)   | O(15)-W(2)-O(1)   | 104.0(4)  | O(15)-W(2)-O(2)   | 177.9(4)  |
| O(15)-W(2)-O(6)   | 101.0(4)  | O(15)-W(2)-O(11)  | 99.3(4)   | O(15)-W(2)-O(16)  | 102.5(4)  |
| O(16)-W(2)-O(2)   | 75.7(4)   | O(16)-W(2)-O(6)   | 155.9(4)  | O(16)-W(2)-O(11)  | 86.3(4)   |
| O(13)-W(3)-O(14)  | 73.6(4)   | O(13)-W(3)-O(17)  | 153.1(4)  | O(13)-W(3)-O(19)  | 87.1(4)   |
| O(17)-W(3)-O(14)  | 83.5(4)   | O(17)-W(3)-O(19)  | 74.1(4)   | O(18)-W(3)-O(13)  | 97.8(4)   |
| O(18)-W(3)-O(14)  | 88.9(4)   | O(18)-W(3)-O(17)  | 95.5(4)   | O(18)-W(3)-O(19)  | 163.5(4)  |
| O(19)-W(3)-O(14)  | 77.4(3)   | O(20)-W(3)-O(13)  | 98.8(4)   | O(20)-W(3)-O(14)  | 168.1(4)  |
| O(20)-W(3)-O(17)  | 101.3(4)  | O(20)-W(3)-O(18)  | 101.4(5)  | O(20)-W(3)-O(19)  | 93.3(4)   |
| O(4)-W(4)-O(6)    | 99.0(4)   | O(4)-W(4)-O(7)    | 87.8(4)   | O(4)-W(4)-O(17)   | 94.4(4)   |
| O(4)-W(4)-O(19)   | 161.7(4)  | O(6)-W(4)-O(7)    | 82.6(4)   | O(6)-W(4)-O(17)   | 157.8(4)  |
| O(6)-W(4)-O(19)   | 88.3(4)   | O(9)-W(4)-O(4)    | 102.5(5)  | O(9)-W(4)-O(6)    | 97.1(4)   |
| O(9)-W(4)-O(7)    | 169.6(4)  | O(9)-W(4)-O(17)   | 97.2(4)   | O(9)-W(4)-O(19)   | 93.2(4)   |
| O(17)-W(4)-O(7)   | 80.3(4)   | O(17)-W(4)-O(19)  | 74.0(4)   | O(19)-W(4)-O(7)   | 76.4(3)   |
| O(3)-W(5)-O(8)    | 90.9(4)   | O(3)-W(5)-O(11)   | 100.1(4)  | O(3)-W(5)-O(13)   | 94.4(4)   |
| O(3)-W(5)-O(14)   | 164.3(4)  | O(5)-W(5)-O(3)    | 103.0(4)  | O(5)-W(5)-O(8)    | 164.7(4)  |
| O(5)-W(5)-O(11)   | 99.6(4)   | O(5)-W(5)-O(13)   | 94.5(4)   | O(5)-W(5)-O(14)   | 88.8(4)   |
| O(8)-W(5)-O(14)   | 76.5(3)   | O(11)-W(5)-O(8)   | 84.2(4)   | O(11)-W(5)-O(13)  | 156.9(4)  |
| O(11)-W(5)-O(14)  | 87.9(4)   | O(13)-W(5)-O(8)   | 77.6(4)   | O(13)-W(5)-O(14)  | 74.1(4)   |
| O(7)-W(6)-O(2)    | 88.7(4)   | O(7)-W(6)-O(12)   | 92.0(4)   | O(7)-W(6)-O(14)   | 95.5(4)   |
| O(7)-W(6)-O(16)   | 160.3(4)  | O(12)-W(6)-O(2)   | 70.5(3)   | O(12)-W(6)-O(16)  | 80.8(4)   |
| O(14)-W(6)-O(2)   | 88.1(4)   | O(14)-W(6)-O(12)  | 157.2(4)  | O(14)-W(6)-O(16)  | 85.1(4)   |
| O(16)-W(6)-O(2)   | 71.6(3)   | O(21)-W(6)-O(2)   | 162.5(4)  | O(21)-W(6)-O(7)   | 103.1(4)  |
| O(21)-W(6)-O(12)  | 95.9(4)   | O(21)-W(6)-O(14)  | 103.4(4)  | O(21)-W(6)-O(16)  | 95.9(4)   |
| O(3)-Mn(1)-O(21)  | 125.8(3)  | O(3)-Mn(1)-Na(6)  | 43.7(2)   | O(5)-Mn(1)-O(3)   | 75.8(3)   |
| O(5)-Mn(1)-O(21)  | 156.4(3)  | O(5)-Mn(1)-O(22)  | 82.2(3)   | O(5)-Mn(1)-O(23)  | 131.6(3)  |
| O(5)-Mn(1)-O(24)  | 84.8(4)   | O(22)-Mn(1)-O(3)  | 148.1(3)  | O(22)-Mn(1)-O(21) | 74.2(3)   |
| O(23)-Mn(1)-O(3)  | 74.2(3)   | O(23)-Mn(1)-O(21) | 69.3(3)   | O(23)-Mn(1)-O(22) | 137.2(3)  |
| O(24)-Mn(1)-O(3)  | 120.5(4)  | O(24)-Mn(1)-O(21) | 90.1(3)   | O(24)-Mn(1)-O(22) | 79.5(4)   |
| O(24)-Mn(1)-O(23) | 78.9(4)   | O(25)-Mn(1)-O(3)  | 81.1(3)   | O(25)-Mn(1)-O(5)  | 91.1(3)   |

|                   |          |                   |          |                   |          |
|-------------------|----------|-------------------|----------|-------------------|----------|
| O(25)-Mn(1)-O(21) | 84.2(3)  | O(25)-Mn(1)-O(22) | 76.5(4)  | O(25)-Mn(1)-O(23) | 120.2(4) |
| O(25)-Mn(1)-O(24) | 155.9(4) | O(10)-Na(1)-O(30) | 170.7(4) | O(10)-Na(1)-Na(2) | 93.3(3)  |
| O(10)-Na(1)-Na(3) | 64.5(3)  | O(10)-Na(1)-Na(5) | 132.8(3) | O(26)-Na(1)-O(10) | 89.3(4)  |
| O(26)-Na(1)-O(28) | 85.2(4)  | O(26)-Na(1)-O(29) | 162.0(4) | O(26)-Na(1)-O(30) | 82.9(4)  |
| O(26)-Na(1)-O(27) | 98.4(4)  | O(28)-Na(1)-O(10) | 80.2(4)  | O(28)-Na(1)-O(29) | 94.2(4)  |
| O(28)-Na(1)-O(30) | 103.9(4) | O(29)-Na(1)-O(10) | 108.4(4) | O(29)-Na(1)-O(30) | 79.8(4)  |
| O(27)-Na(1)-O(10) | 78.7(4)  | O(27)-Na(1)-O(28) | 158.6(4) | O(27)-Na(1)-O(29) | 88.8(4)  |
| O(27)-Na(1)-O(30) | 97.5(4)  | O(29)-Na(2)-O(32) | 103.0(4) | O(29)-Na(2)-O(32) | 163.9(5) |
| O(29)-Na(2)-O(33) | 80.0(4)  | O(31)-Na(2)-O(29) | 82.8(4)  | O(31)-Na(2)-O(32) | 103.7(4) |
| O(31)-Na(2)-O(33) | 88.7(4)  | O(32)-Na(2)-O(32) | 88.6(4)  | O(32)-Na(2)-O(33) | 160.5(5) |
| O(27)-Na(2)-O(29) | 87.9(4)  | O(27)-Na(2)-O(31) | 168.4(5) | O(27)-Na(2)-O(32) | 78.2(4)  |
| O(27)-Na(2)-O(32) | 83.5(4)  | O(27)-Na(2)-O(33) | 82.8(4)  | O(29)-Na(3)-O(20) | 140.3(5) |
| O(33)-Na(3)-O(20) | 118.1(5) | O(33)-Na(3)-O(29) | 71.1(4)  | O(24)-Na(4)-O(1)  | 137.6(5) |
| O(24)-Na(4)-O(27) | 91.5(4)  | O(32)-Na(4)-O(1)  | 123.7(5) | O(32)-Na(4)-O(24) | 98.3(5)  |
| O(32)-Na(4)-O(27) | 68.6(4)  | O(27)-Na(4)-O(1)  | 97.9(5)  | O(30)-Na(5)-O(4)  | 98.9(4)  |
| O(15)-Na(6)-O(3)  | 97.5(4)  | O(25)-Na(6)-O(3)  | 81.0(4)  | O(25)-Na(6)-O(15) | 90.6(4)  |
| O(25)-Na(6)-O(26) | 83.1(4)  | O(26)-Na(6)-O(3)  | 81.7(4)  | O(26)-Na(6)-O(15) | 173.6(4) |
| O(28)-Na(6)-O(3)  | 96.5(4)  | O(28)-Na(6)-O(15) | 101.0(4) | O(28)-Na(6)-O(25) | 168.4(4) |
| O(28)-Na(6)-O(26) | 85.4(4)  |                   |          |                   |          |

**Alert level B**

PLAT097\_ALERT\_2\_B Large Reported Max. (Positive) Residual Density 7.85 eA-3  
W5 W6  
PLAT355\_ALERT\_3\_B Long O-H (X0.82,N0.98A) O23 - H23 . 1.09 Ang.  
PLAT420\_ALERT\_2\_B D-H Bond Without Acceptor O29 --H29 . Please Check

PLAT097\_ALERT\_2\_B: Compound 1 was sealed in a glass tube by the single crystal X-ray diffraction. W5 and W6 in compound 1 have a low temperature factor, which may be due to the crystal quality. We tested the single crystal X-ray diffraction of the three synthetic single crystals of compound 1, and the results showed that W5 and W6 still have these problems.  
PLAT355\_ALERT\_2\_B and PLAT420\_ALERT\_2\_B: These two alerts are hydrogen bonding problems attributed to free water molecules and do not affect the main structure.

**Alert level B**

PLAT342\_ALERT\_3\_B Low Bond Precision on C-C Bonds ..... 0.02792 Ang.  
PLAT412\_ALERT\_2\_B Short Intra XH3 .. XHn H8 ..H17C . 1.79 Ang.  
x, y, z = 1\_555 Check  
PLAT420\_ALERT\_2\_B D-H Bond Without Acceptor O41 --H41D . Please Check  
PLAT420\_ALERT\_2\_B D-H Bond Without Acceptor O41 --H41E . Please Check  
PLAT420\_ALERT\_2\_B D-H Bond Without Acceptor O43 --H43B . Please Check  
PLAT430\_ALERT\_2\_B Short Inter D...A Contact O22 ..N8 . 2.74 Ang.  
x, y, z = 1\_555 Check  
PLAT430\_ALERT\_2\_B Short Inter D...A Contact O24 ..N10 . 2.69 Ang.  
1+x, y, z = 1\_655 Check

PLAT342\_ALERT\_3\_B: Compound 2 was sealed in a glass tube by the single crystal X-ray diffraction. This test method may cause the problem of low bond precision on C-C bonds. We tested the single crystal X-ray diffraction of the three synthetic single crystals of compound 2, and the results showed that low bond precision on C-C bonds still exist.  
PLAT412\_ALERT\_2\_B, PLAT420\_ALERT\_2\_B and PLAT430\_ALERT\_2\_B: These two

alert are hydrogen bonding problems attributed to free water molecules and do not affect the main structure.

**Table S4 Selected bond lengths (Å) and angles for Compound 2**

|                  |            |                  |            |                  |           |
|------------------|------------|------------------|------------|------------------|-----------|
| W(1)-O(7)        | 1.890(12)  | W(1)-O(10)       | 1.937(13)  | W(1)-O(15)       | 1.919(10) |
| W(1)-O(33)       | 1.930(11)  | W(1)-O(36)       | 2.248(11)  | W(1)-O(37)       | 1.710(12) |
| W(2)-W(11)       | 3.2330(10) | W(2)-O(2)        | 2.175(10)  | W(2)-O(7)        | 1.948(12) |
| W(2)-O(19)       | 1.917(12)  | W(2)-O(24)       | 1.948(10)  | W(2)-O(27)       | 1.885(12) |
| W(2)-O(35)       | 1.735(12)  | W(3)-O(1)        | 1.897(12)  | W(3)-O(4)        | 1.899(10) |
| W(3)-O(8)        | 1.944(11)  | W(3)-O(11)       | 2.218(11)  | W(3)-O(39)       | 1.705(12) |
| W(3)-O(40)       | 1.918(12)  | W(4)-O(3)        | 1.882(11)  | W(4)-O(16)       | 1.892(11) |
| W(4)-O(31)       | 1.947(13)  | W(4)-O(33)       | 1.957(11)  | W(4)-O(34)       | 1.685(11) |
| W(4)-O(36)       | 2.283(11)  | W(5)-W(8)        | 3.2324(10) | W(5)-O(14)       | 1.938(12) |
| W(5)-O(15)       | 1.884(11)  | W(5)-O(25)       | 1.919(12)  | W(5)-O(26)       | 1.720(11) |
| W(5)-O(27)       | 1.935(12)  | W(5)-O(29)       | 2.193(11)  | W(6)-O(1)        | 1.951(11) |
| W(6)-O(11)       | 2.270(11)  | W(6)-O(21)       | 1.923(10)  | W(6)-O(22)       | 1.932(11) |
| W(6)-O(28)       | 1.732(12)  | W(6)-O(32)       | 1.901(11)  | W(7)-O(2)        | 2.158(10) |
| W(7)-O(9)        | 1.711(10)  | W(7)-O(12)       | 1.962(10)  | W(7)-O(18)       | 1.922(11) |
| W(7)-O(24)       | 1.951(11)  | W(7)-O(31)       | 1.886(12)  | W(8)-O(5)        | 1.914(11) |
| W(8)-O(6)        | 1.921(11)  | W(8)-O(21)       | 1.891(10)  | W(8)-O(23)       | 1.735(12) |
| W(8)-O(25)       | 1.951(11)  | W(8)-O(29)       | 2.198(12)  | W(9)-O(4)        | 1.922(11) |
| W(9)-O(5)        | 1.924(11)  | W(9)-O(13)       | 1.698(12)  | W(9)-O(14)       | 1.943(11) |
| W(9)-O(17)       | 1.904(11)  | W(9)-O(29)       | 2.196(11)  | W(10)-O(8)       | 1.919(11) |
| W(10)-O(11)      | 2.217(11)  | W(10)-O(16)      | 1.920(11)  | W(10)-O(18)      | 1.888(11) |
| W(10)-O(22)      | 1.954(12)  | W(10)-O(30)      | 1.731(11)  | W(11)-O(2)       | 2.171(11) |
| W(11)-O(12)      | 1.920(10)  | W(11)-O(17)      | 1.931(11)  | W(11)-O(19)      | 1.962(11) |
| W(11)-O(38)      | 1.740(12)  | W(11)-O(40)      | 1.906(11)  | W(12)-O(3)       | 1.972(11) |
| W(12)-O(6)       | 1.894(11)  | W(12)-O(10)      | 1.924(11)  | W(12)-O(20)      | 1.726(13) |
| W(12)-O(32)      | 1.949(11)  | W(12)-O(36)      | 2.217(12)  |                  |           |
| O(7)-W(1)-O(10)  | 161.7(5)   | O(7)-W(1)-O(15)  | 85.4(5)    | O(7)-W(1)-O(33)  | 91.6(5)   |
| O(7)-W(1)-O(36)  | 88.4(4)    | O(10)-W(1)-O(36) | 74.0(4)    | O(15)-W(1)-O(10) | 88.2(5)   |
| O(15)-W(1)-O(33) | 160.2(5)   | O(15)-W(1)-O(36) | 85.1(4)    | O(33)-W(1)-O(10) | 88.6(5)   |
| O(33)-W(1)-O(36) | 75.2(4)    | O(37)-W(1)-O(7)  | 101.5(5)   | O(37)-W(1)-O(10) | 96.6(5)   |
| O(37)-W(1)-O(15) | 102.6(5)   | O(37)-W(1)-O(33) | 97.2(5)    | O(37)-W(1)-O(36) | 167.9(5)  |
| O(2)-W(2)-W(11)  | 41.9(3)    | O(7)-W(2)-W(11)  | 130.2(3)   | O(7)-W(2)-O(2)   | 88.4(4)   |
| O(7)-W(2)-O(24)  | 87.1(4)    | O(19)-W(2)-W(11) | 34.0(3)    | O(19)-W(2)-O(2)  | 75.9(4)   |
| O(19)-W(2)-O(7)  | 164.2(5)   | O(19)-W(2)-O(24) | 90.6(4)    | O(24)-W(2)-O(2)  | 74.9(4)   |
| O(27)-W(2)-O(2)  | 90.1(5)    | O(27)-W(2)-O(7)  | 84.0(5)    | O(27)-W(2)-O(19) | 94.0(5)   |
| O(27)-W(2)-O(24) | 162.8(5)   | O(35)-W(2)-O(2)  | 166.6(5)   | O(35)-W(2)-O(7)  | 99.9(5)   |
| O(35)-W(2)-O(19) | 95.9(5)    | O(35)-W(2)-O(24) | 94.9(5)    | O(35)-W(2)-O(27) | 101.1(5)  |
| O(1)-W(3)-O(4)   | 89.9(5)    | O(1)-W(3)-O(8)   | 88.5(5)    | O(1)-W(3)-O(11)  | 74.0(4)   |
| O(1)-W(3)-O(40)  | 159.0(5)   | O(4)-W(3)-O(8)   | 160.0(5)   | O(4)-W(3)-O(11)  | 86.8(4)   |
| O(4)-W(3)-O(40)  | 85.7(5)    | O(8)-W(3)-O(11)  | 73.6(4)    | O(39)-W(3)-O(1)  | 99.5(6)   |
| O(39)-W(3)-O(4)  | 102.8(5)   | O(39)-W(3)-O(8)  | 97.1(5)    | O(39)-W(3)-O(11) | 168.5(5)  |
| O(39)-W(3)-O(40) | 101.6(6)   | O(40)-W(3)-O(8)  | 88.7(5)    | O(40)-W(3)-O(11) | 85.2(5)   |
| O(3)-W(4)-O(16)  | 92.5(5)    | O(3)-W(4)-O(31)  | 160.0(4)   | O(3)-W(4)-O(33)  | 89.9(5)   |
| O(3)-W(4)-O(36)  | 74.8(4)    | O(16)-W(4)-O(31) | 84.2(5)    | O(16)-W(4)-O(33) | 159.3(5)  |
| O(16)-W(4)-O(36) | 86.9(4)    | O(31)-W(4)-O(33) | 86.6(5)    | O(31)-W(4)-O(36) | 85.3(4)   |
| O(34)-W(4)-O(3)  | 100.4(5)   | O(33)-W(4)-O(36) | 73.9(4)    | O(34)-W(4)-O(16) | 103.4(5)  |
| O(34)-W(4)-O(31) | 99.6(5)    | O(34)-W(4)-O(33) | 96.3(5)    | O(34)-W(4)-O(36) | 168.9(5)  |
| O(14)-W(5)-O(29) | 74.0(4)    | O(15)-W(5)-O(14) | 161.8(5)   | O(15)-W(5)-O(25) | 92.7(5)   |
| O(15)-W(5)-O(27) | 83.4(5)    | O(15)-W(5)-O(29) | 89.2(4)    | O(25)-W(5)-O(14) | 90.2(5)   |
| O(25)-W(5)-O(27) | 163.9(5)   | O(25)-W(5)-O(29) | 76.3(4)    | O(26)-W(5)-O(14) | 96.3(5)   |



|                   |          |                   |          |                   |          |
|-------------------|----------|-------------------|----------|-------------------|----------|
| O(26)-W(5)-O(15)  | 101.2(5) | O(26)-W(5)-O(25)  | 96.7(5)  | O(26)-W(5)-O(27)  | 99.4(5)  |
| O(26)-W(5)-O(29)  | 167.8(5) | O(27)-W(5)-O(14)  | 88.8(5)  | O(27)-W(5)-O(29)  | 88.0(5)  |
| O(1)-W(6)-O(11)   | 71.8(4)  | O(21)-W(6)-O(1)   | 88.6(5)  | O(21)-W(6)-O(11)  | 87.6(5)  |
| O(21)-W(6)-O(22)  | 160.8(5) | O(22)-W(6)-O(1)   | 87.6(5)  | O(22)-W(6)-O(11)  | 73.3(4)  |
| O(28)-W(6)-O(10)  | 97.5(6)  | O(28)-W(6)-O(11)  | 165.7(5) | O(28)-W(6)-O(21)  | 102.0(5) |
| O(28)-W(6)-O(22)  | 97.1(5)  | O(28)-W(6)-O(32)  | 101.4(6) | O(32)-W(6)-O(1)   | 161.1(5) |
| O(32)-W(6)-O(11)  | 89.5(5)  | O(32)-W(6)-O(21)  | 87.6(5)  | O(32)-W(6)-O(22)  | 89.9(5)  |
| O(9)-W(7)-O(2)    | 164.2(5) | O(9)-W(7)-O(12)   | 94.5(5)  | O(9)-W(7)-O(18)   | 102.6(5) |
| O(9)-W(7)-O(24)   | 93.1(5)  | O(9)-W(7)-O(31)   | 100.7(5) | O(12)-W(7)-O(2)   | 75.2(4)  |
| O(18)-W(7)-O(2)   | 89.0(4)  | O(18)-W(7)-O(12)  | 87.1(5)  | O(18)-W(7)-O(24)  | 164.2(4) |
| O(24)-W(7)-O(2)   | 75.3(4)  | O(24)-W(7)-O(12)  | 90.2(5)  | O(31)-W(7)-O(2)   | 90.6(4)  |
| O(31)-W(7)-O(12)  | 164.6(4) | O(31)-W(7)-O(18)  | 86.7(5)  | O(31)-W(7)-O(24)  | 91.9(5)  |
| O(5)-W(8)-O(6)    | 160.1(5) | O(5)-W(8)-O(25)   | 91.5(5)  | O(5)-W(8)-O(29)   | 74.3(4)  |
| O(6)-W(8)-O(25)   | 87.2(5)  | O(6)-W(8)-O(29)   | 86.2(4)  | O(21)-W(8)-O(5)   | 89.9(5)  |
| O(21)-W(8)-O(6)   | 85.5(5)  | O(21)-W(8)-O(25)  | 162.4(5) | O(21)-W(8)-O(29)  | 87.9(5)  |
| O(23)-W(8)-O(5)   | 100.0(5) | O(23)-W(8)-O(6)   | 99.8(5)  | O(23)-W(8)-O(21)  | 100.4(5) |
| O(23)-W(8)-O(25)  | 96.7(5)  | O(23)-W(8)-O(29)  | 170.1(5) | O(25)-W(8)-O(29)  | 75.6(4)  |
| O(4)-W(9)-O(5)    | 88.2(5)  | O(4)-W(9)-O(14)   | 161.4(5) | O(4)-W(9)-O(29)   | 87.7(5)  |
| O(5)-W(9)-O(14)   | 89.0(5)  | O(5)-W(9)-O(29)   | 74.2(4)  | O(13)-W(9)-O(4)   | 102.2(5) |
| O(13)-W(9)-O(5)   | 97.5(6)  | O(13)-W(9)-O(14)  | 96.4(5)  | O(13)-W(9)-O(17)  | 100.6(6) |
| O(13)-W(9)-O(29)  | 167.0(5) | O(14)-W(9)-O(29)  | 73.8(4)  | O(17)-W(9)-O(4)   | 86.2(5)  |
| O(17)-W(9)-O(5)   | 161.8(5) | O(17)-W(9)-O(14)  | 90.8(5)  | O(17)-W(9)-O(29)  | 88.3(5)  |
| O(8)-W(10)-O(11)  | 74.1(4)  | O(8)-W(10)-O(16)  | 160.8(5) | O(8)-W(10)-O(22)  | 89.1(5)  |
| O(16)-W(10)-O(11) | 86.7(4)  | O(16)-W(10)-O(22) | 87.4(5)  | O(18)-W(10)-O(8)  | 91.2(5)  |
| O(18)-W(10)-O(11) | 86.6(4)  | O(18)-W(10)-O(16) | 85.8(5)  | O(18)-W(10)-O(22) | 159.9(5) |
| O(22)-W(10)-O(11) | 74.2(4)  | O(30)-W(10)-O(8)  | 96.8(5)  | O(30)-W(10)-O(11) | 167.5(5) |
| O(30)-W(10)-O(16) | 102.4(5) | O(30)-W(10)-O(18) | 102.5(5) | O(30)-W(10)-O(22) | 97.4(5)  |
| O(12)-W(11)-O(2)  | 75.7(4)  | O(12)-W(11)-O(17) | 162.3(5) | O(12)-W(11)-O(19) | 91.2(5)  |
| O(17)-W(11)-O(2)  | 87.0(4)  | O(17)-W(11)-O(19) | 87.6(4)  | O(19)-W(11)-O(2)  | 75.1(5)  |
| O(38)-W(11)-O(2)  | 169.5(5) | O(38)-W(11)-O(12) | 98.5(5)  | O(38)-W(11)-O(17) | 99.2(5)  |
| O(38)-W(11)-O(19) | 96.6(6)  | O(38)-W(11)-O(40) | 99.5(6)  | O(40)-W(11)-O(2)  | 89.4(5)  |
| O(40)-W(11)-O(12) | 91.1(5)  | O(40)-W(11)-O(17) | 85.2(5)  | O(40)-W(11)-O(19) | 163.2(5) |
| O(3)-W(12)-O(36)  | 74.8(4)  | O(6)-W(12)-O(3)   | 160.1(5) | O(6)-W(12)-O(10)  | 92.3(4)  |
| O(6)-W(12)-O(32)  | 86.3(4)  | O(6)-W(12)-O(36)  | 86.5(4)  | O(10)-W(12)-O(3)  | 89.3(5)  |
| O(10)-W(12)-O(32) | 161.6(5) | O(10)-W(12)-O(36) | 75.0(5)  | O(20)-W(12)-O(3)  | 97.8(5)  |
| O(20)-W(12)-O(6)  | 101.5(5) | O(20)-W(12)-O(10) | 100.2(6) | O(20)-W(12)-O(32) | 98.1(6)  |
| O(20)-W(12)-O(36) | 171.0(5) | O(32)-W(12)-O(3)  | 85.9(5)  | O(32)-W(12)-O(36) | 86.6(5)  |

## 2.2 The structural diagrams of compounds 1-2

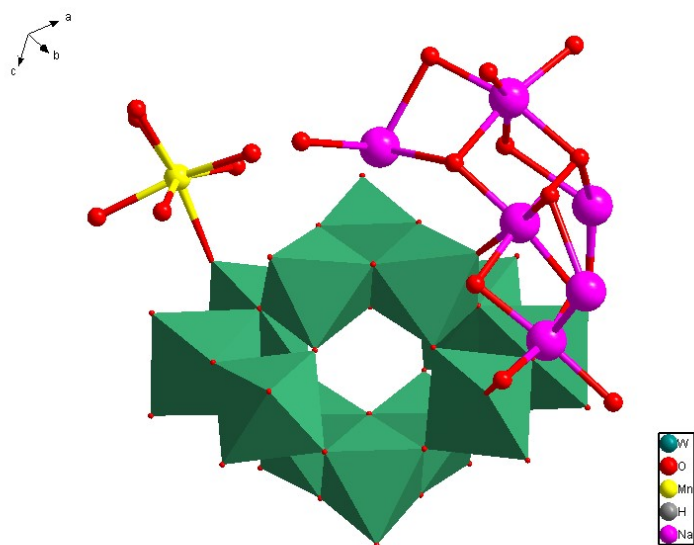

Figure S2 monomer diagram of Compound 1

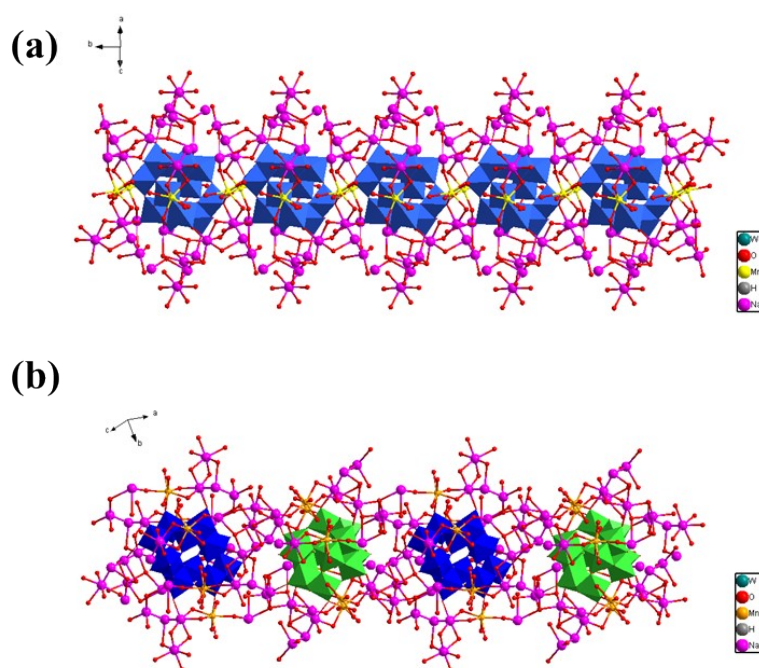

Figure S3 (a) Views of 1D-1 chain structure of Compound 1 (b) Views of 1D-2 chain of Compound 1

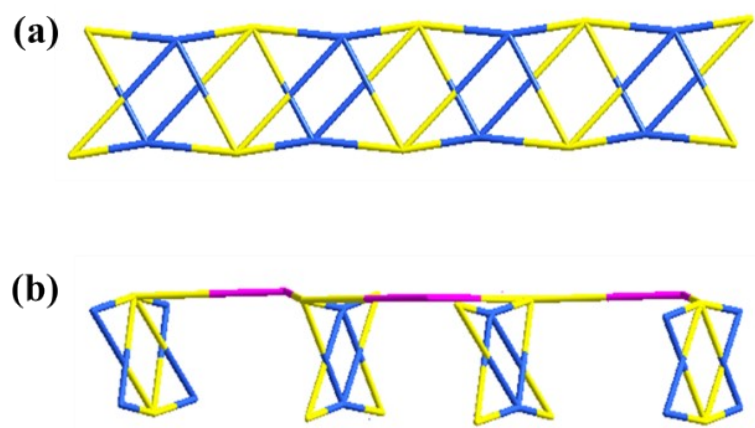

Figure S4 (a) The simplified diagram of 1D-1 (b) The simplified diagram of 1D-2

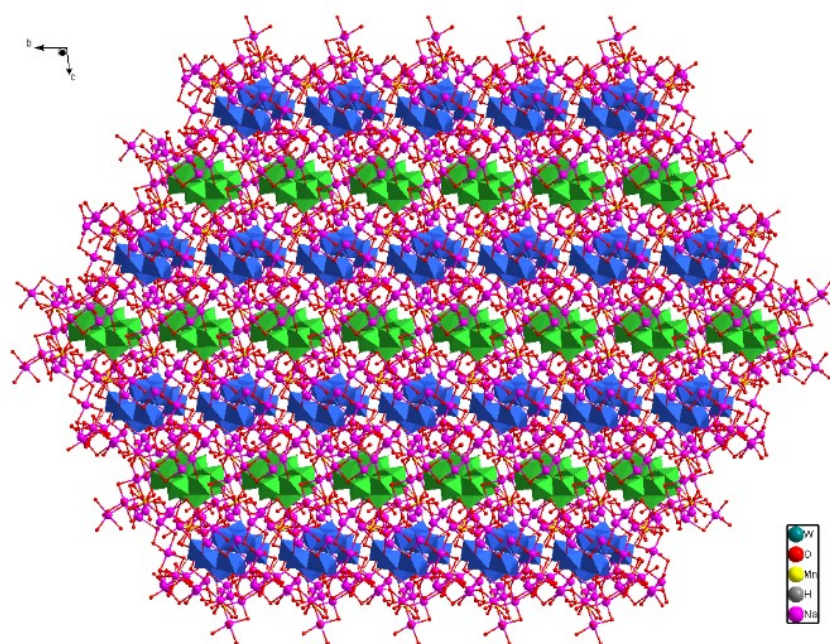

Figure S5 Views of 2D-1 structure of layer structure of Compound 1

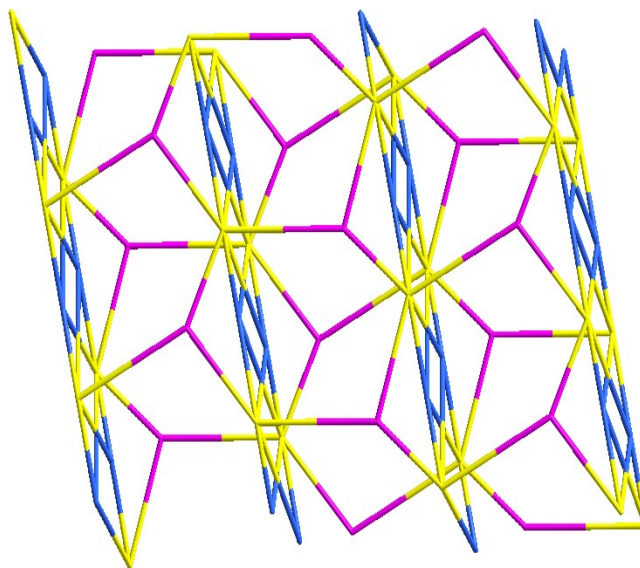

**Figure S6 The simplified diagram of 2D-1**

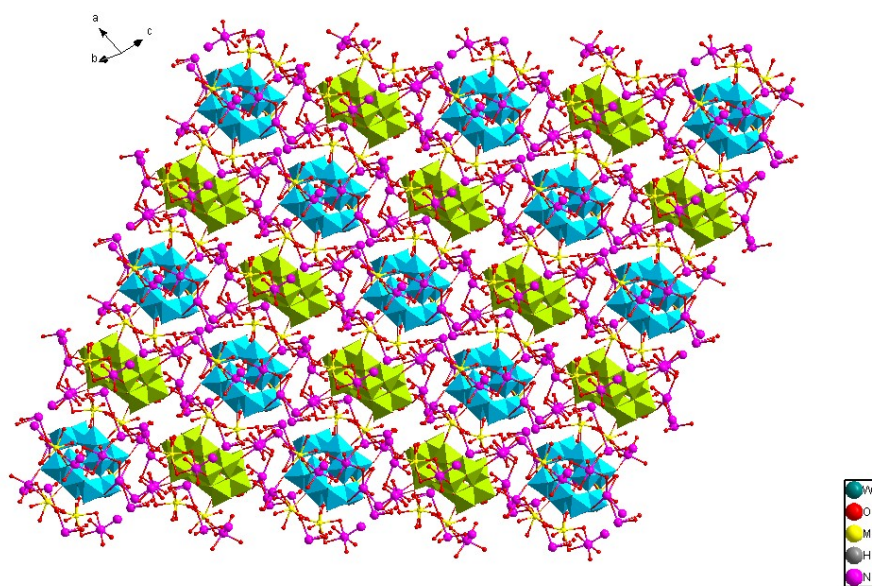

**Figure S7 Views of 2D-2 structure of Compound 1**

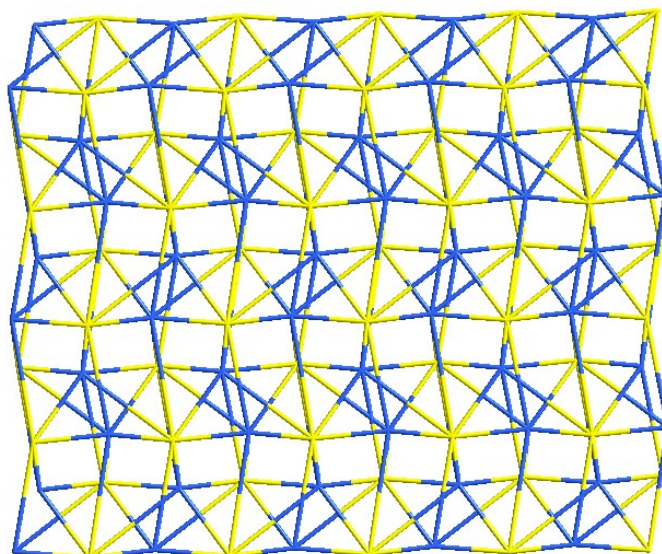

**Figure S8** The simplified diagram of 2D-1

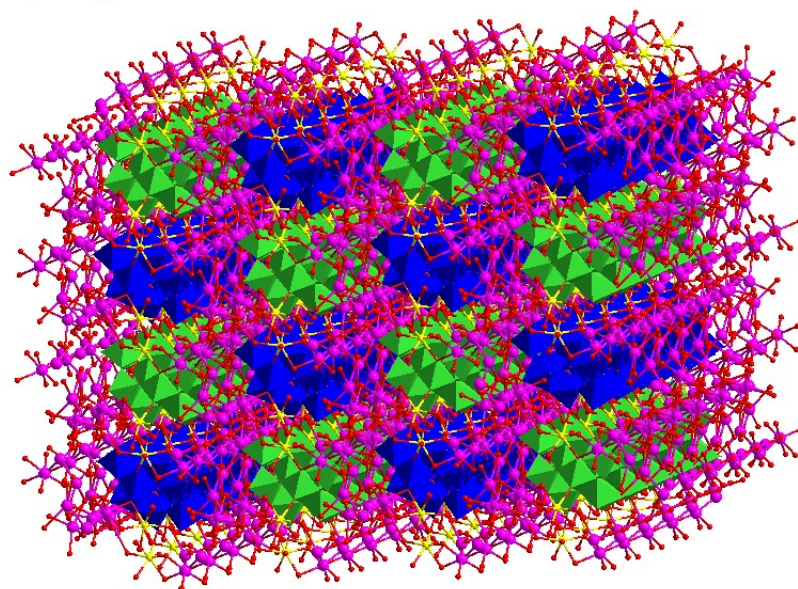

**Figure S9** Views of 3D structure of Compound 1

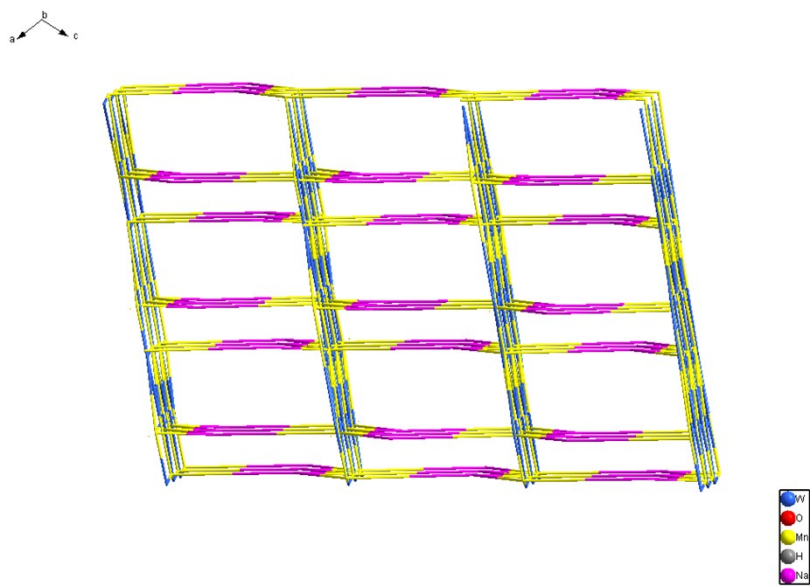

**Figure S10** The simplified diagram of 3D

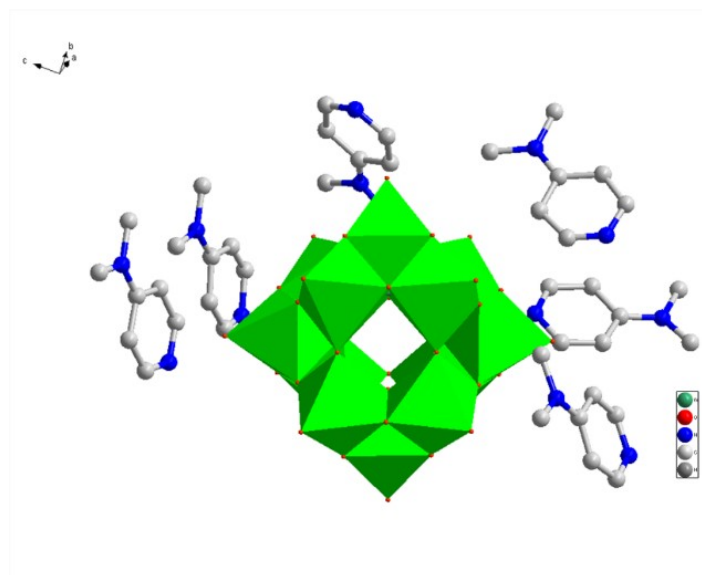

**Figure S11** The monomer diagram of Compound 2

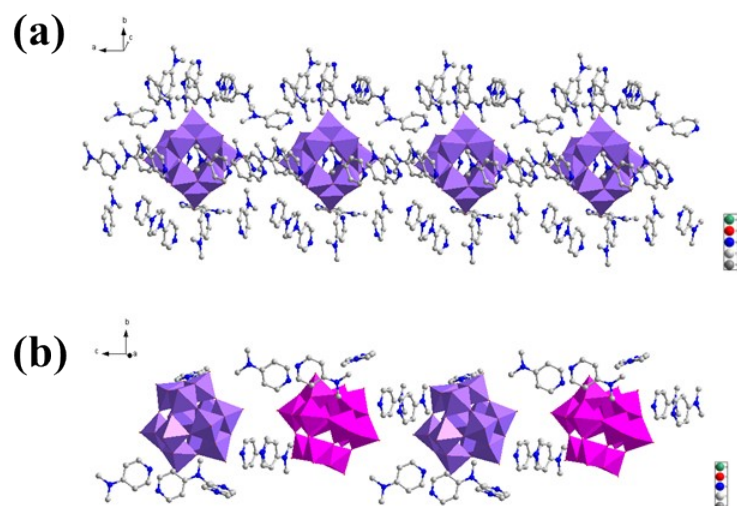

**Figure S12 (a) Views of 1D-1 chain structure of Compound 2 (b)Views of 1D-2 chain of Compound 2**

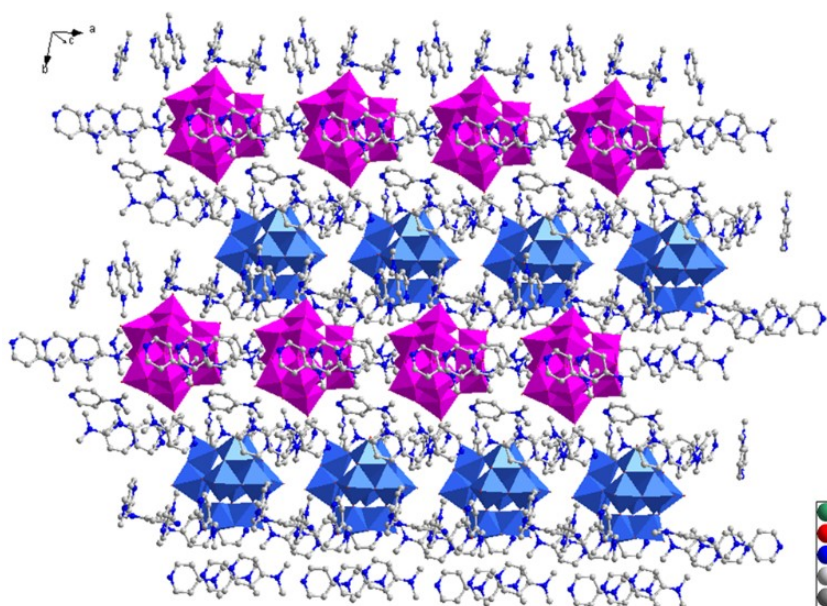

**Figure S13 Views of 2D-1 structure of layer structure of Compound 2**

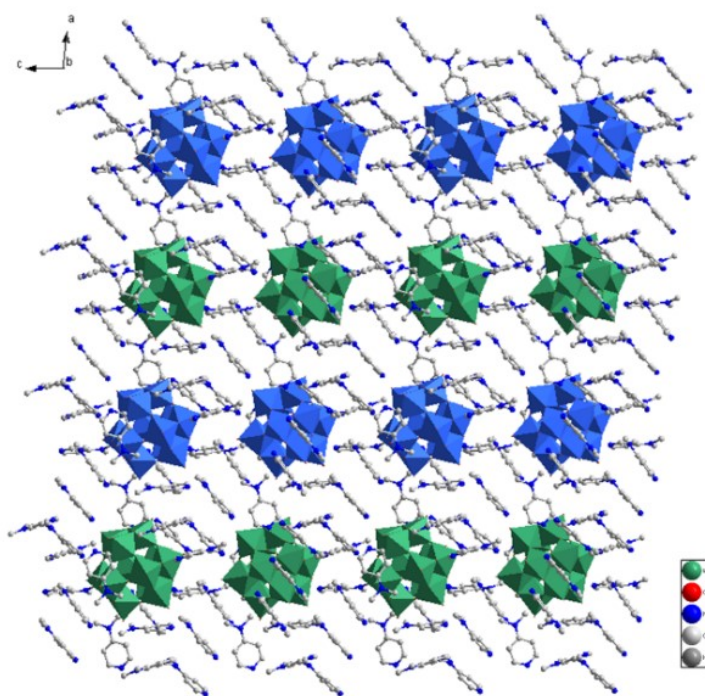

**Figure S14 Views of 2D-2 structure of Compound 2**

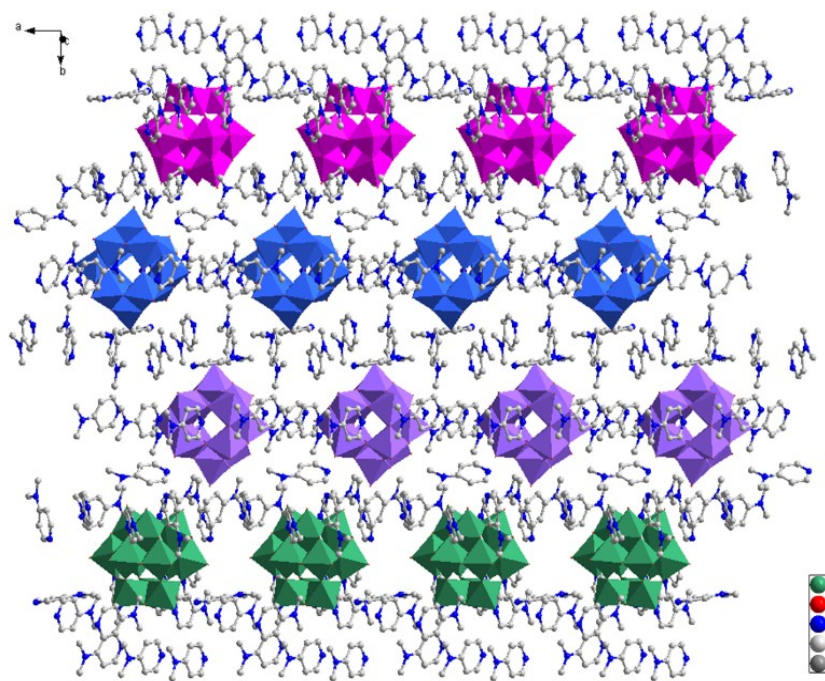

**Figure S15 Views of 2D-3 structure of Compound 2**



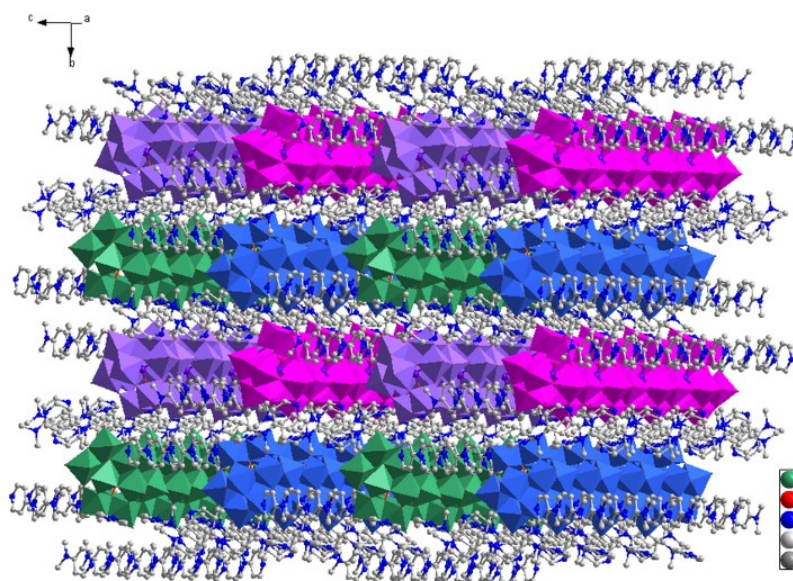

Figure S16 Views of 3D structure of Compound 2

### 2.3 The characterization diagrams of compounds 1-2

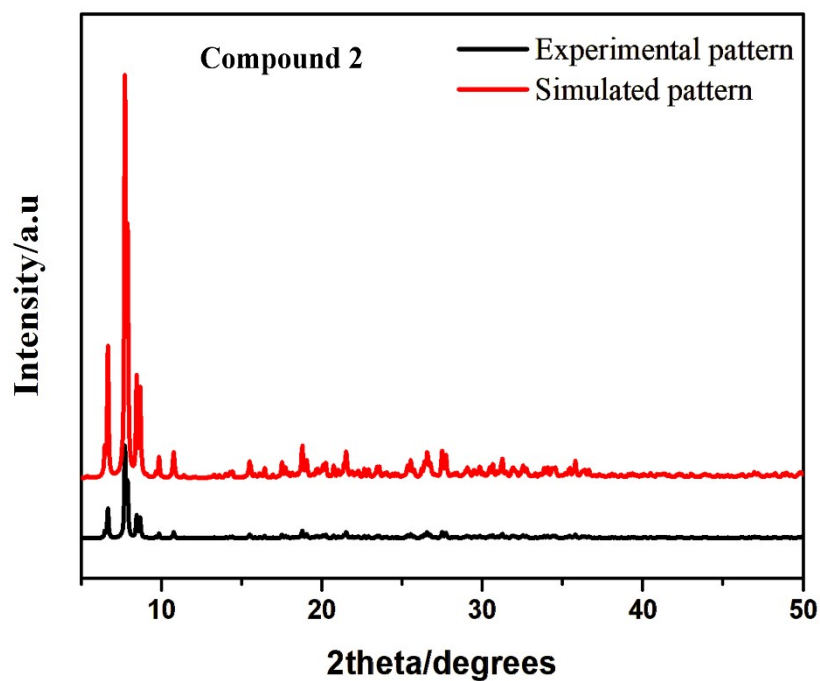

Figure S17 XRD of Compound 2

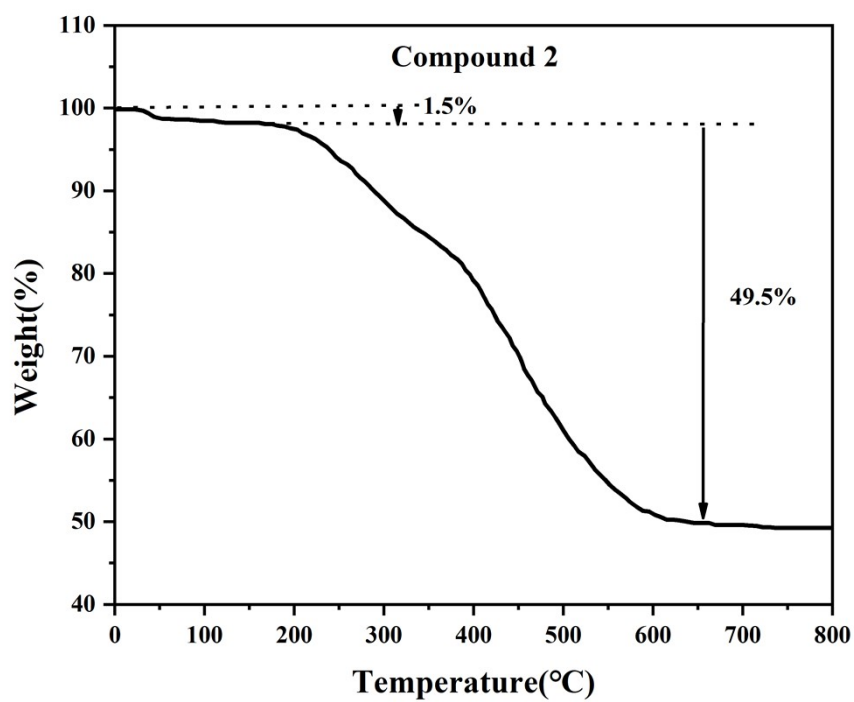

**Figure S18 TG of Compound 2**

| <b>Name</b> | <b>Atomic %</b> |
|-------------|-----------------|
| Mn2p        | 1.38            |
| Na1s        | 3.87            |
| O1s         | 36.14           |
| W4f         | 9.78            |

**Figure S19 The elemental ratio of XPS of Compound 1**

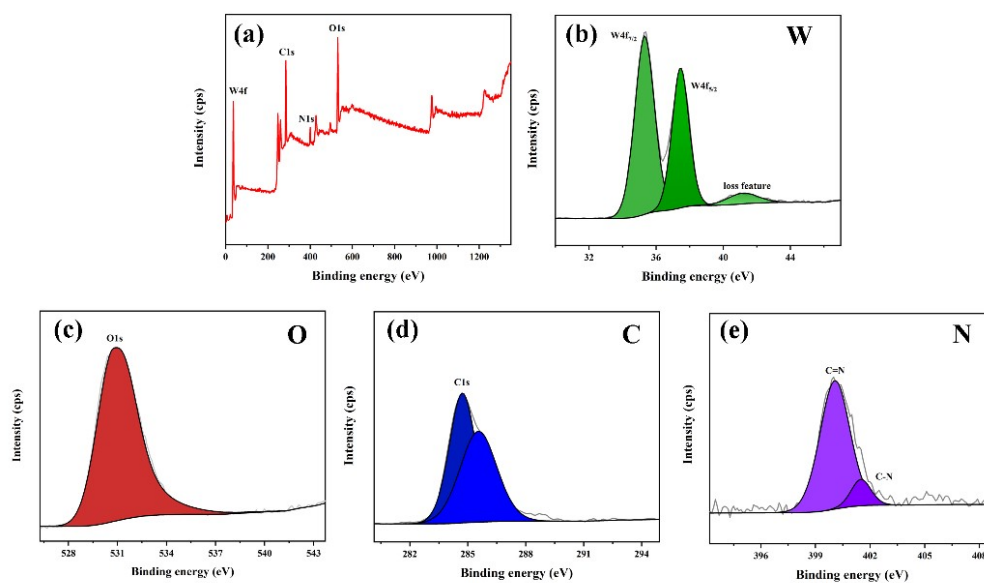

**Figure S20 (a)The XPS of Compound 2(b-e) XPS spectra of W4f, O1s, C1s and N1s for Compound 2**

| <b>Name</b> | <b>Atomic %</b> |
|-------------|-----------------|
| C1s         | 59.57           |
| N1s         | 7.25            |
| O1s         | 25.61           |
| W4f         | 7.34            |

**Figure S21 The elemental ratio of XPS of Compound 2**

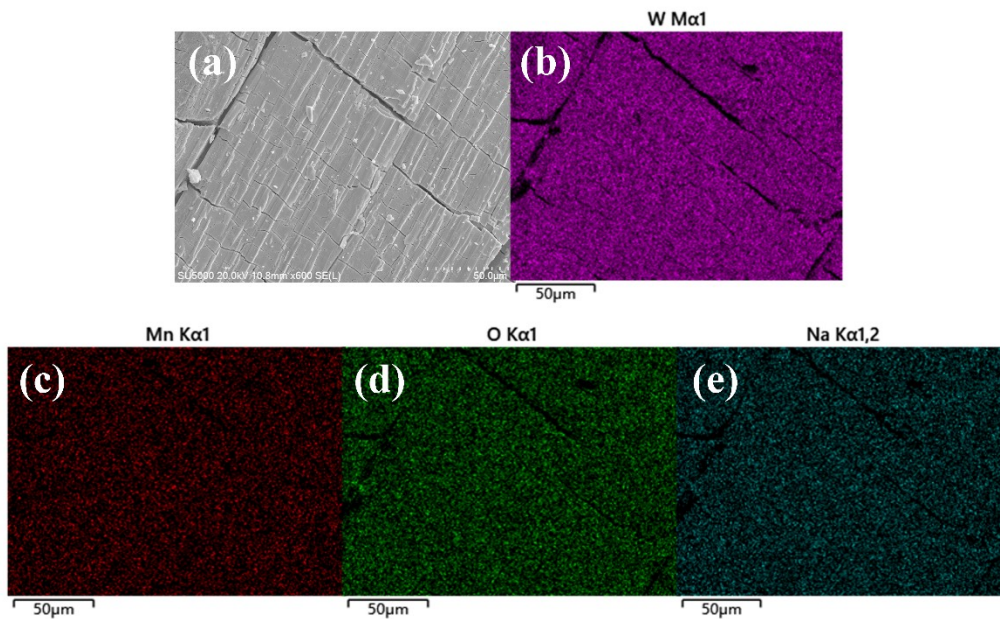

**Figure S22 (a)The higher-SEM images of Compound 1 (b-e)The mapping of Compound 1**

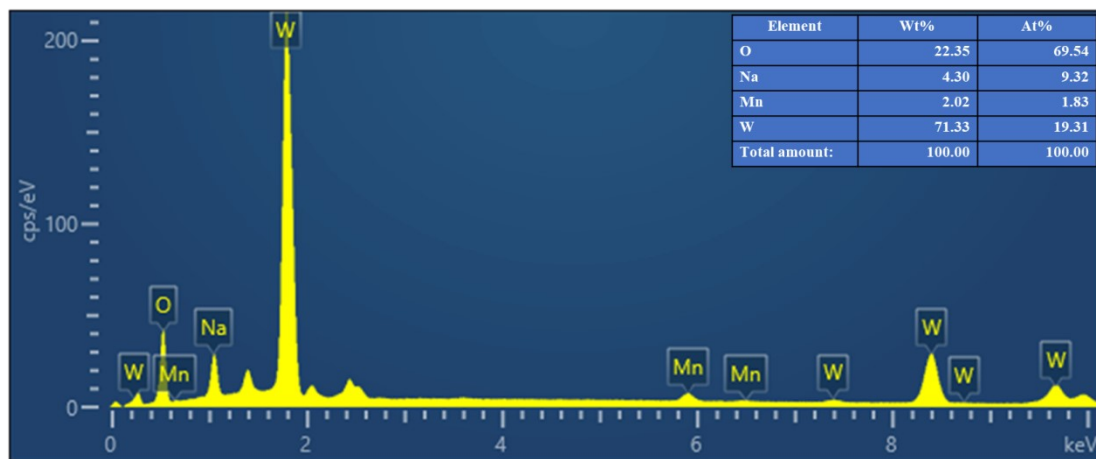

**Figure S23 EDS of Compound 1**

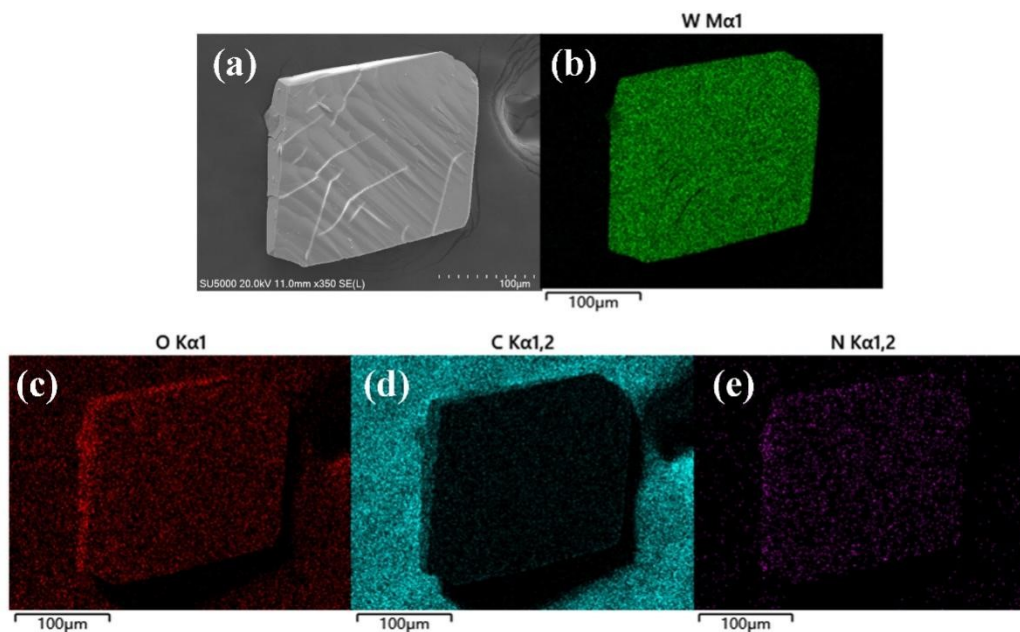

**Figure S24(a)**The SEM images of Compound 2**(b-e)**The mapping of Compound 2

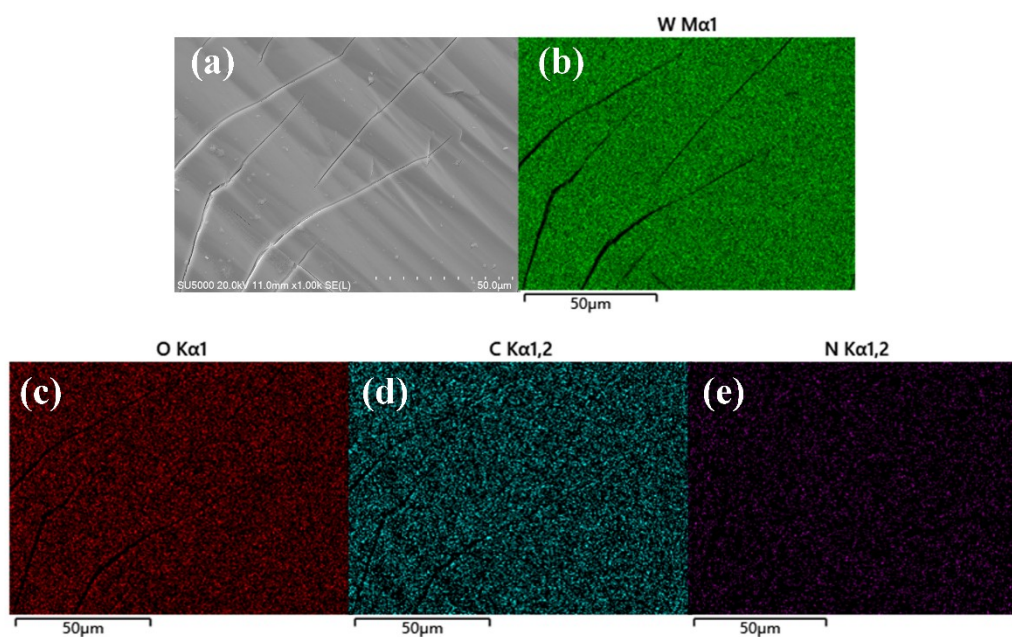

**Figure S25 (a)**The higher-SEM images of Compound 2 **(b-e)** The mapping of Compound 2

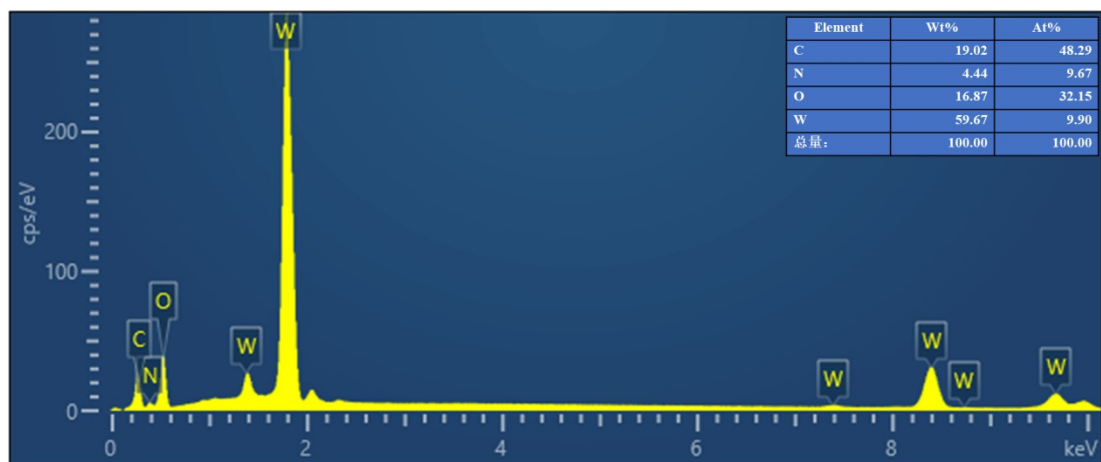

Figure S26 EDS of Compound 2

## 2.4 BET of Compound 1 and Compound 2

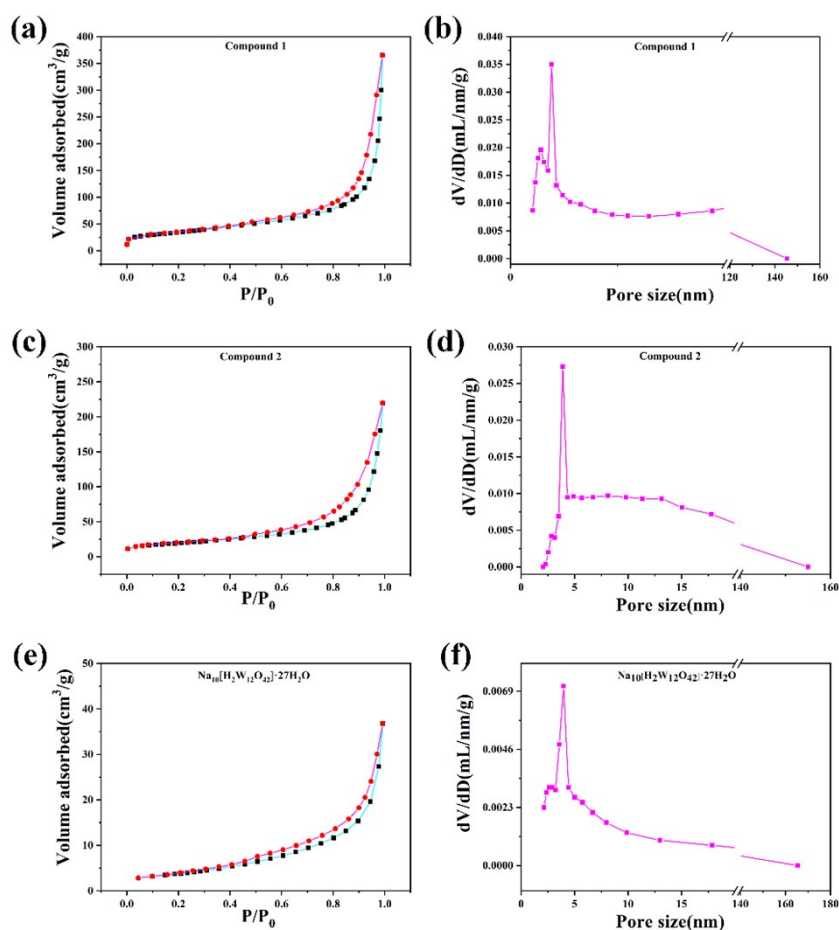

Figure S27 N<sub>2</sub>-adsorption–desorption isotherms of (a) Compound 1, (c) Compound 2, (e) Na<sub>10</sub>[H<sub>2</sub>W<sub>12</sub>O<sub>42</sub>]·27H<sub>2</sub>O; pore size distributions of (b) Compound 1, (d) Compound 2, (f) Na<sub>10</sub>[H<sub>2</sub>W<sub>12</sub>O<sub>42</sub>]·27H<sub>2</sub>O

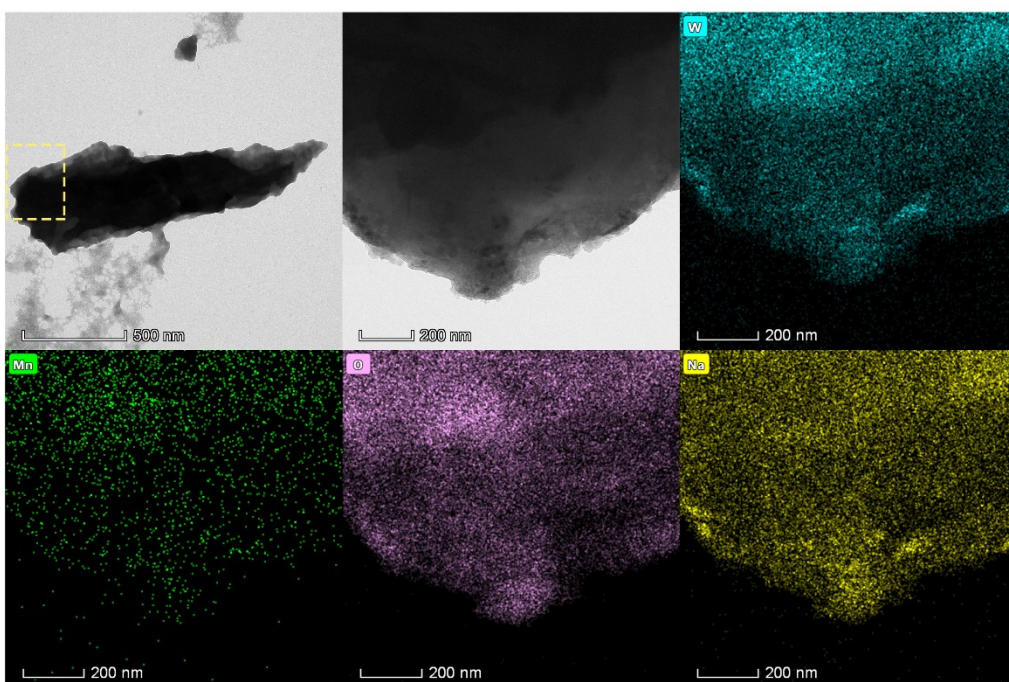

**Figure S28 TEM of Compound 1**

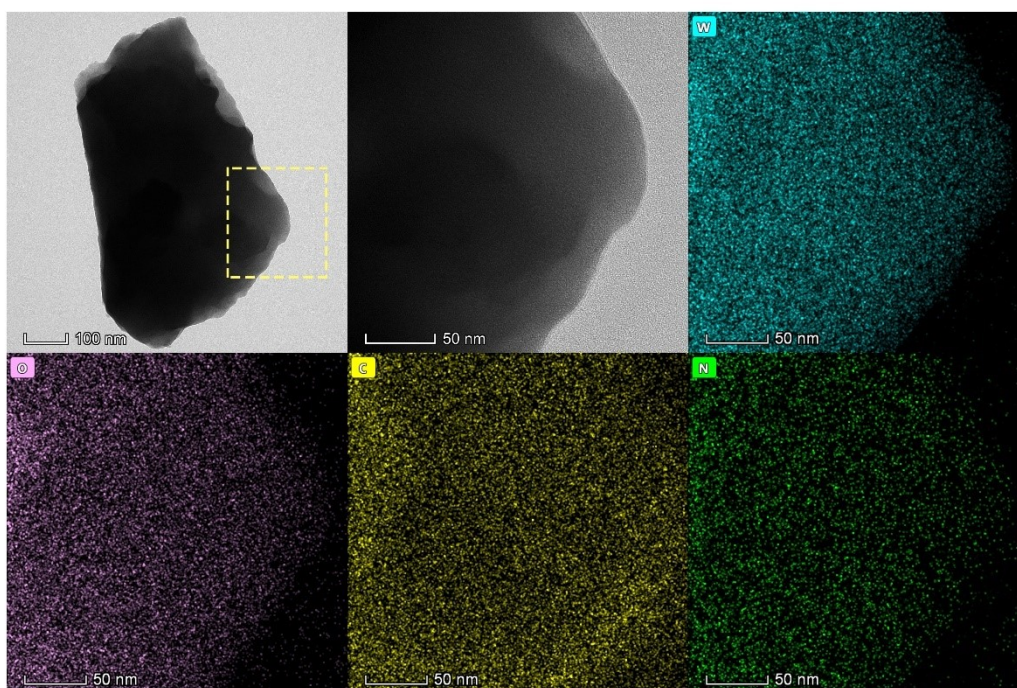

**Figure S29 TEM of Compound 2**

## 2.5 HER experiments of Compound 1 and Compound 2 in 0.5 M H<sub>2</sub>SO<sub>4</sub>

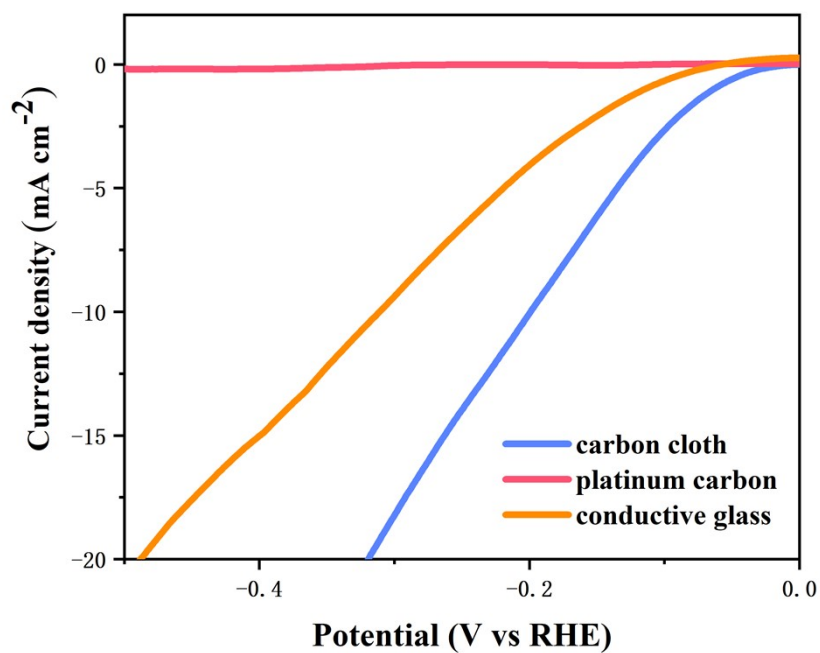

Figure S30 Polarization curves (LSV) of different fluid collectors

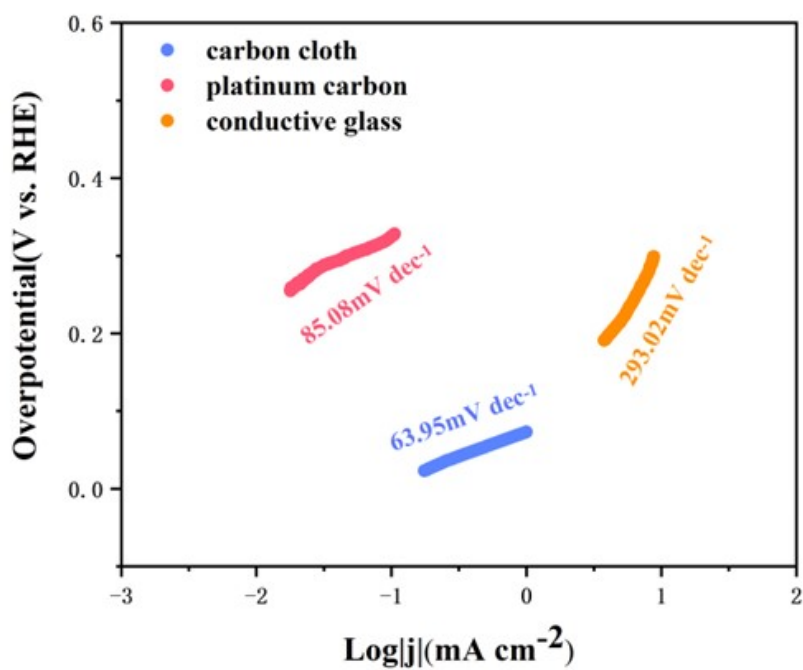

Figure S31 Tafel plots of different fluid collectors



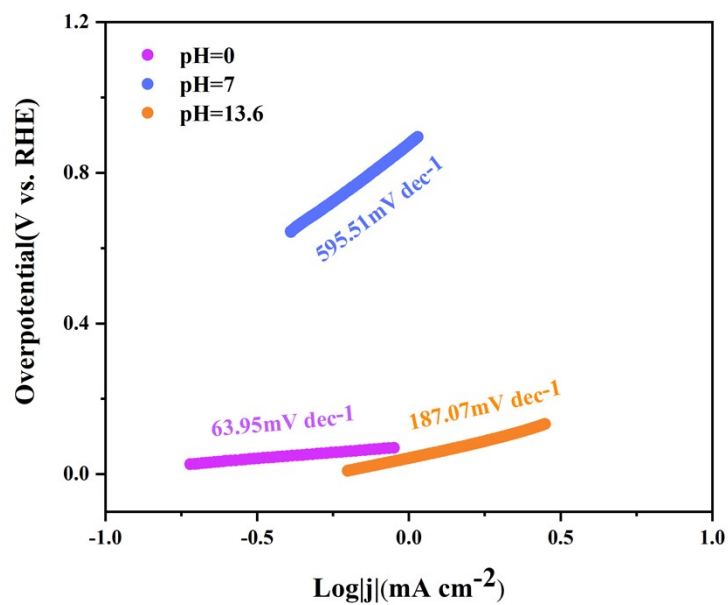

Figure S32 Tafel plots of different pH, measured during HER experiment in 0.5M H<sub>2</sub>SO<sub>4</sub> (pH = 0) electrolyte solution

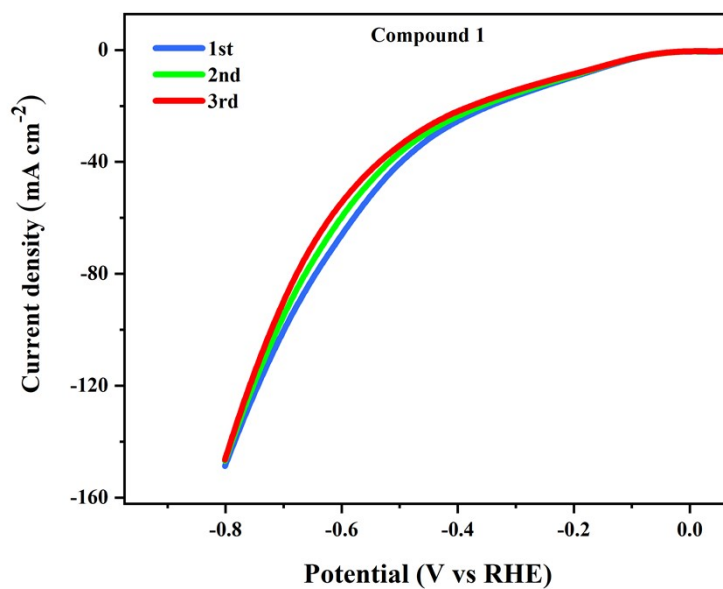

Figure S33 The three LSV curves of Compound 1 for HER test

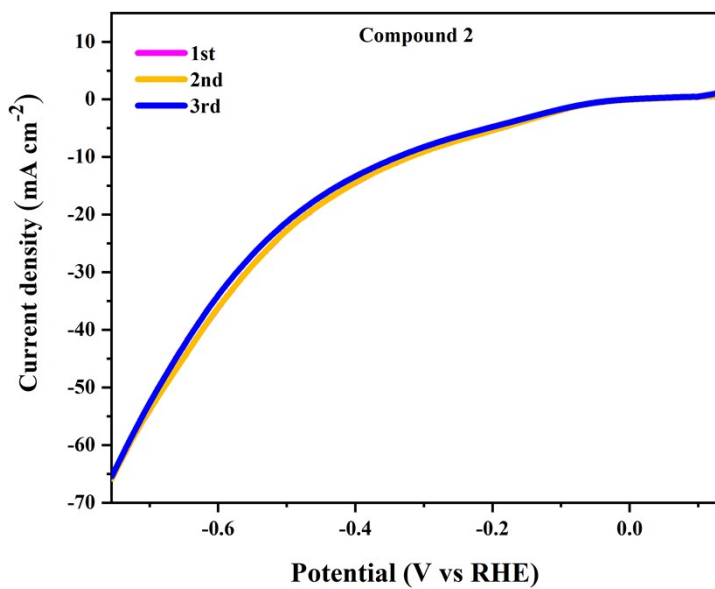

Figure S34 The three LSV curves of Compound 2 for HER test

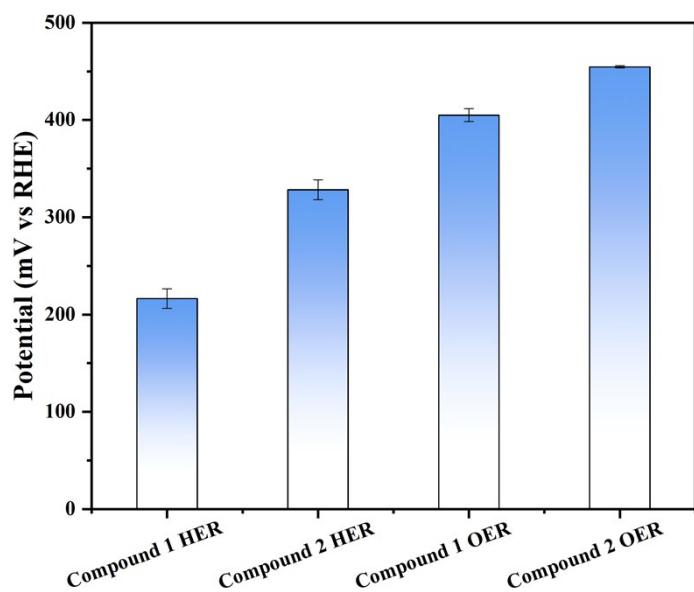

Figure S35 Mean and standard deviation of overpotential values for multiple tests

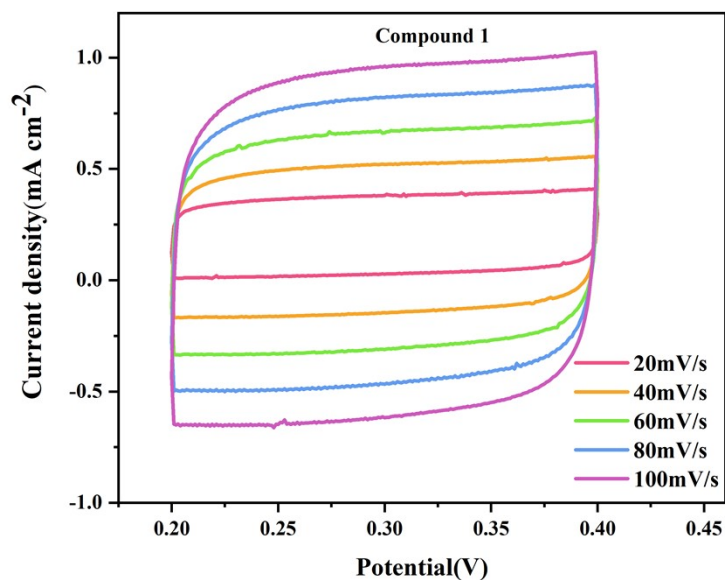

Figure S36 Cyclic voltammety curves of Compound 1, measured during HER experiment in 0.5M H<sub>2</sub>SO<sub>4</sub> (pH = 0) electrolyte solution

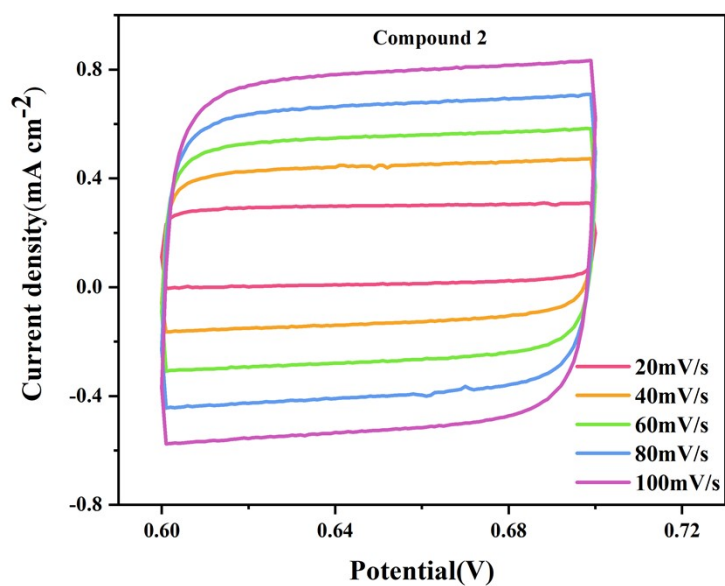

Figure S37 Cyclic voltammety curves of Compound 2, measured during HER experiment in 0.5M H<sub>2</sub>SO<sub>4</sub> (pH = 0) electrolyte solution

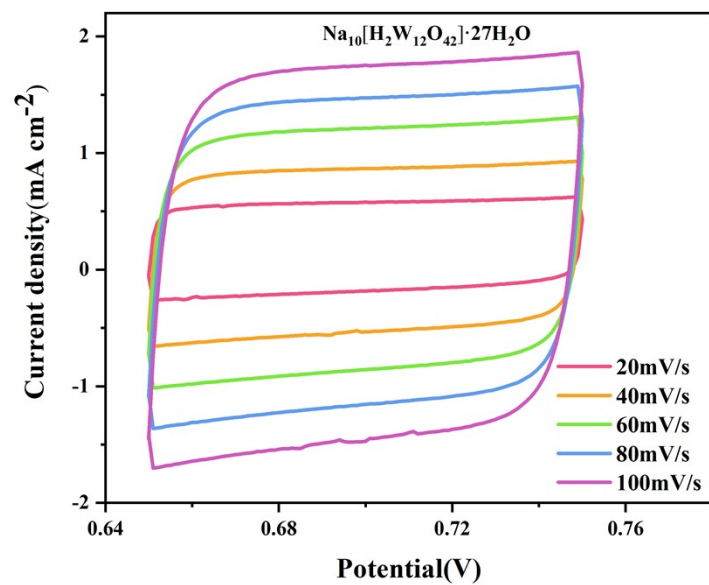

Figure S38 Cyclic voltammety curves of  $\text{Na}_{10}[\text{H}_2\text{W}_{12}\text{O}_{42}] \cdot 27\text{H}_2\text{O}$ , measured during HER experiment in  $0.5\text{M H}_2\text{SO}_4$  (pH = 0) electrolyte solution

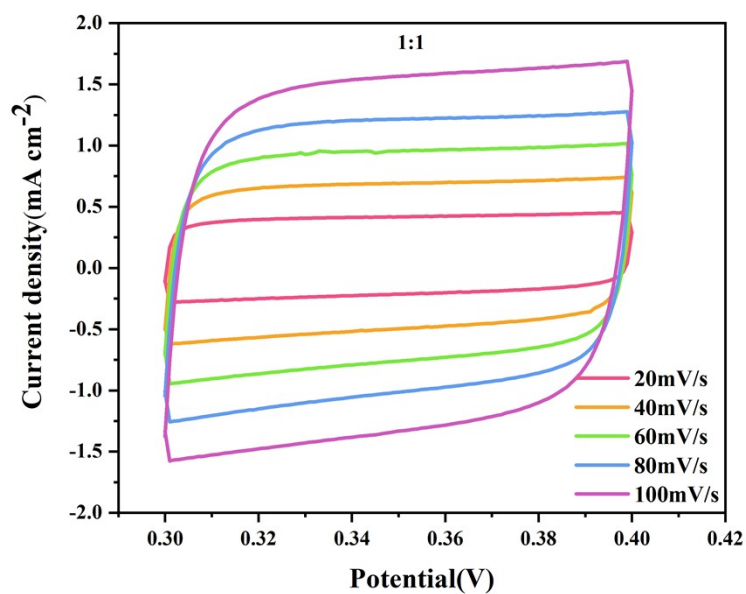

Figure S39 Cyclic voltammety curves of the ratio of Compound 1 to carbon black is 1:1, measured during HER experiment in  $0.5\text{M H}_2\text{SO}_4$  (pH = 0) electrolyte solution

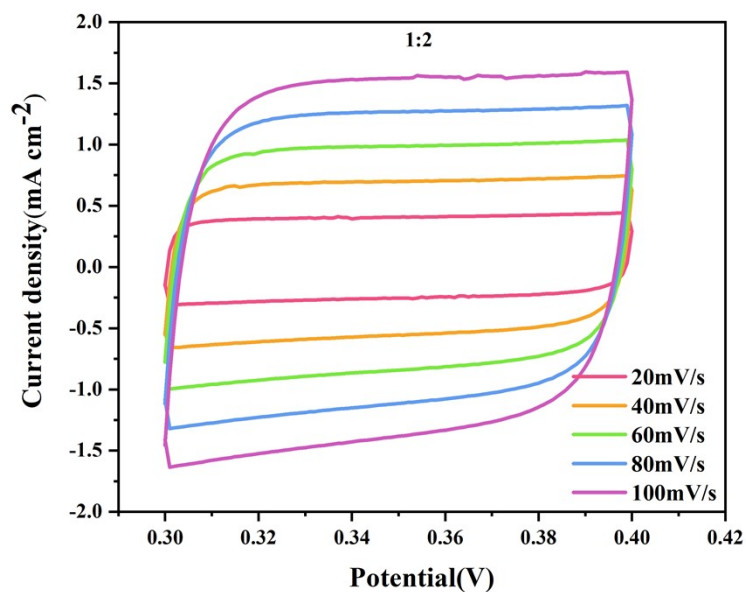

**Figure S40** Cyclic voltammety curves of the ratio of Compound 1 to carbon black is 1:2, measured during HER experiment in 0.5M H<sub>2</sub>SO<sub>4</sub> (pH = 0) electrolyte solution

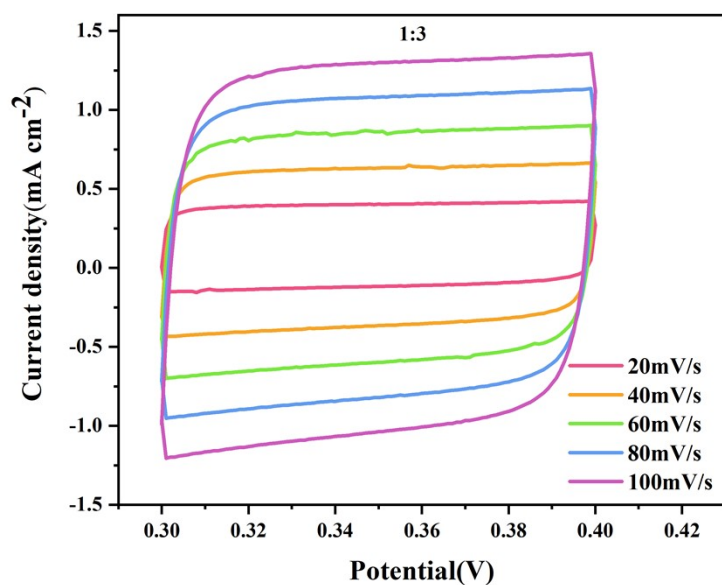

**Figure S41** Cyclic voltammety curves of the ratio of Compound 1 to carbon black is 1:3, measured during HER experiment in 0.5M H<sub>2</sub>SO<sub>4</sub> (pH = 0) electrolyte solution

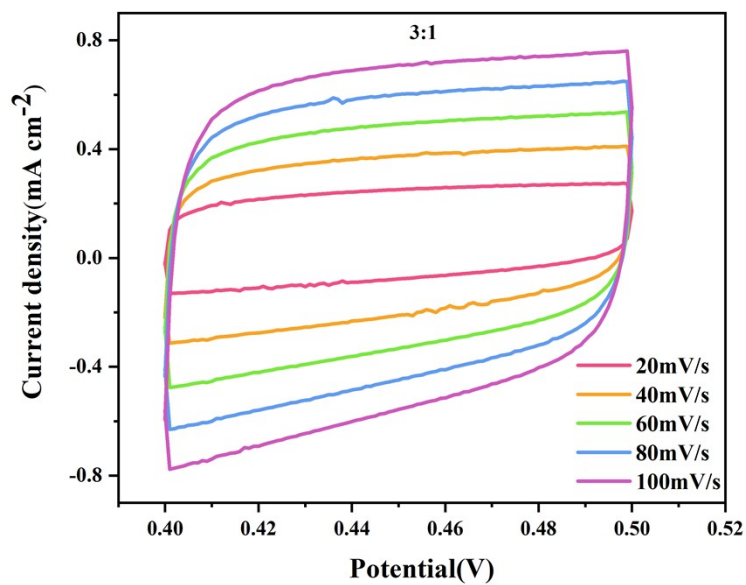

Figure S42 Cyclic voltammety curves of the different active species / carbon black ratios, measured during HER experiment in 0.5M  $\text{H}_2\text{SO}_4$  ( $\text{pH} = 0$ ) electrolyte solution

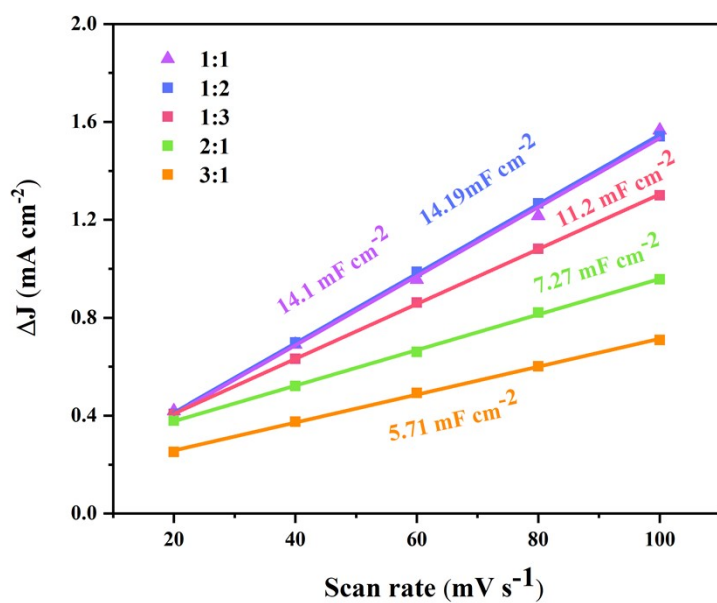

Figure S43 The Cdl of different active species / carbon black ratios measured during HER experiment

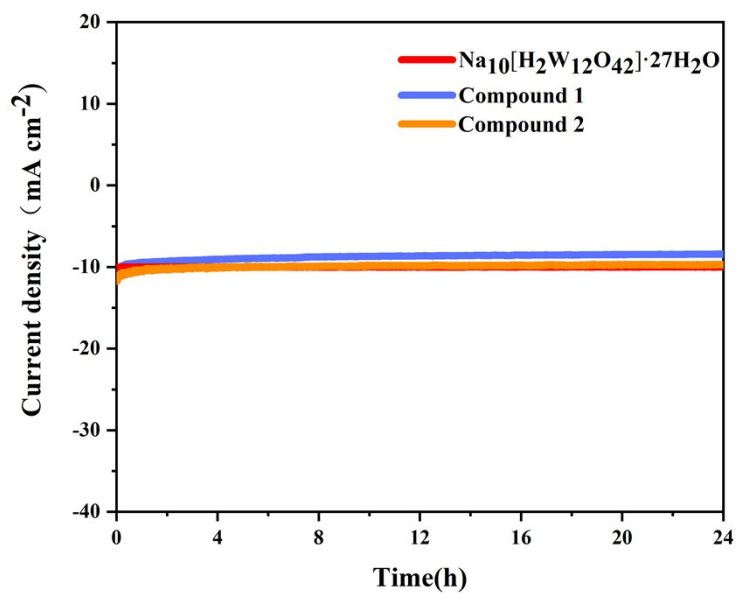

**Figure S44** The chronoamperometry curve of different Compounds measured during HER experiment

**Table S5 Compare with some polyoxometalates in the literature for HER**

| <b>HER</b>                                                                                           |                                      |                                   |                                          | <b>Ref</b> |
|------------------------------------------------------------------------------------------------------|--------------------------------------|-----------------------------------|------------------------------------------|------------|
| <b>Catalyst</b>                                                                                      | <b>Electrolyte</b>                   | <b><math>\eta_{10}</math>(mV)</b> | <b>Tafel slope (mV dec<sup>-1</sup>)</b> |            |
| NENU-501                                                                                             | 0.5 M H <sub>2</sub> SO <sub>4</sub> | 392                               | 137                                      | 1          |
| NENU-500<br>(Polyoxometalate: [e-Zn <sub>4</sub> PMo <sub>8</sub> Mo <sub>4</sub> O <sub>40</sub> ]) | 0.5 M H <sub>2</sub> SO <sub>4</sub> | 237                               | 96                                       | 1          |
| NVBO-I                                                                                               | 0.5 M H <sub>2</sub> SO <sub>4</sub> | 308                               | 194                                      | 2          |
| Cu-W-P/CC<br>(Polyoxometalate: PMo <sub>12</sub> )                                                   | 0.5 M H <sub>2</sub> SO <sub>4</sub> | 187.4                             | 85.1                                     | 4          |
| 1D Co(fcdHp)                                                                                         | 0.5 M H <sub>2</sub> SO <sub>4</sub> | 450                               | 120                                      | 5          |
| [Cu <sub>2</sub> (NL) <sub>2</sub> ·4H <sub>2</sub> O] (NTU-33)                                      | 0.5 M H <sub>2</sub> SO <sub>4</sub> | 560                               | 158                                      | 6          |
| H <sub>8</sub> L-Co-Crystal MOF                                                                      | 0.5 M H <sub>2</sub> SO <sub>4</sub> | 234                               | 102                                      | 7          |
| MoP                                                                                                  | 0.5 M H <sub>2</sub> SO <sub>4</sub> | 297                               | 82                                       | 3          |
| POM-MoP<br>(Polyoxometalate: PMO <sub>12</sub> O <sub>40</sub> )                                     | 0.5 M H <sub>2</sub> SO <sub>4</sub> | 198                               | 80                                       | 3          |
| NVBO-I                                                                                               | 0.5 M H <sub>2</sub> SO <sub>4</sub> | 308                               | 194                                      | 2          |
| [H <sub>2</sub> TETA][Ni(H <sub>2</sub> hedp) <sub>2</sub> ]-2H <sub>2</sub> O                       | 0.5 M H <sub>2</sub> SO <sub>4</sub> | 398                               | 232                                      | 10         |
| HPOM-MoP/C<br>(Polyoxometalate: PMO <sub>12</sub> O <sub>40</sub> )                                  | 0.5 M H <sub>2</sub> SO <sub>4</sub> | 187                               | 55                                       | 16         |
| POM@ZnCoS/NF<br>(Polyoxometalate: PW <sub>12</sub> )                                                 | 1 M KOH                              | 170                               | 535                                      | 8          |
| POM =PW <sub>12</sub>                                                                                | 1 M KOH                              | 240                               | —                                        | 8          |
| ZnCo DHNWs                                                                                           | 1 M KOH                              | 227                               | 120.5                                    | 8          |
| ZnCoS NWs                                                                                            | 1 M KOH                              | 206                               | 108.6                                    | 8          |
| Cu <sub>3</sub> P/CuP <sub>2</sub> /CC {HKUST-1}                                                     | 0.5 M H <sub>2</sub> SO <sub>4</sub> | 266.1                             | 86.9                                     | 18         |
| MoP/CC<br>(Polyoxometalate: PMo <sub>12</sub> )                                                      | 0.5 M H <sub>2</sub> SO <sub>4</sub> | 223.6                             | 74.2                                     | 18         |
| Cu-W-P/CC<br>(Polyoxometalate: PMo <sub>12</sub> )                                                   | 0.5 M H <sub>2</sub> SO <sub>4</sub> | 187.4                             | 85.1                                     | 18         |
| CoS <sub>2</sub> -MoS <sub>2</sub>                                                                   | 0.5 M H <sub>2</sub> SO <sub>4</sub> | 220                               | 64.2                                     | 17         |



|                                                                                                                                              |                                      |      |      |    |
|----------------------------------------------------------------------------------------------------------------------------------------------|--------------------------------------|------|------|----|
| Mn/oMA-PW/RCPE                                                                                                                               | 1 M KOH                              | 380  | 111  | 22 |
| WSe <sub>2</sub> /Co <sub>0.85</sub> Se/graphene                                                                                             | 0.5 M H <sub>2</sub> SO <sub>4</sub> | 217  | 64   | 23 |
| POM@Ni-MOF                                                                                                                                   | 0.5 M H <sub>2</sub> SO <sub>4</sub> | 68   | 77.3 | 27 |
| Co <sub>9</sub> S <sub>8</sub> @MoS <sub>2</sub><br>(Polyoxometalate: PMo <sub>12</sub> )                                                    | 1M KOH                               | 230  | 84   | 28 |
| NiCo <sub>2</sub> S <sub>4</sub> /PANI@POM/rGO<br>(Polyoxometalate:PW <sub>12</sub> O <sub>40</sub> )                                        | 1M KOH                               | 197  | 47.5 | 29 |
| RuPOM/KB<br>(Polyoxometalate: SiW <sub>10</sub> O <sub>36</sub> )                                                                            | Seawater (pH 8.1)                    | 760  | —    | 30 |
| Ni-Mo <sub>2</sub> C/NPC<br>(Polyoxometalate: (NH <sub>4</sub> ) <sub>4</sub> [NiMo <sub>6</sub> O <sub>24</sub> H <sub>6</sub> ])           | 1.0 M KOH                            | 183  | 64   | 31 |
| Co <sub>4</sub> Mo <sub>2</sub> @NC<br>(Polyoxometalate: (NH <sub>4</sub> ) <sub>6</sub> Mo <sub>7</sub> O <sub>24</sub> ·4H <sub>2</sub> O) | 1.0 M KOH                            | ~218 | 73.5 | 32 |
| HC800<br>(Polyoxometalate: (NH <sub>4</sub> ) <sub>6</sub> Mo <sub>7</sub> O <sub>24</sub> ·4H <sub>2</sub> O)                               | 0.5 M H <sub>2</sub> SO <sub>4</sub> | 192  | 98   | 33 |
| SL-MoS <sub>2</sub> -CNT<br>(Polyoxometalate: (NH <sub>4</sub> ) <sub>6</sub> Mo <sub>7</sub> O <sub>24</sub> )                              | 0.1 M H <sub>2</sub> SO <sub>4</sub> | 236  | 63   | 34 |
| CoMoS-600<br>(Polyoxometalate:H <sub>3</sub> PMo <sub>12</sub> O <sub>40</sub> x·H <sub>2</sub> O)                                           | 0.5 M H <sub>2</sub> SO <sub>4</sub> | 235  | 65.5 | 35 |

## 2.6 OER experiments of Compound 1 and Compound 2 in 0.5 M KOH

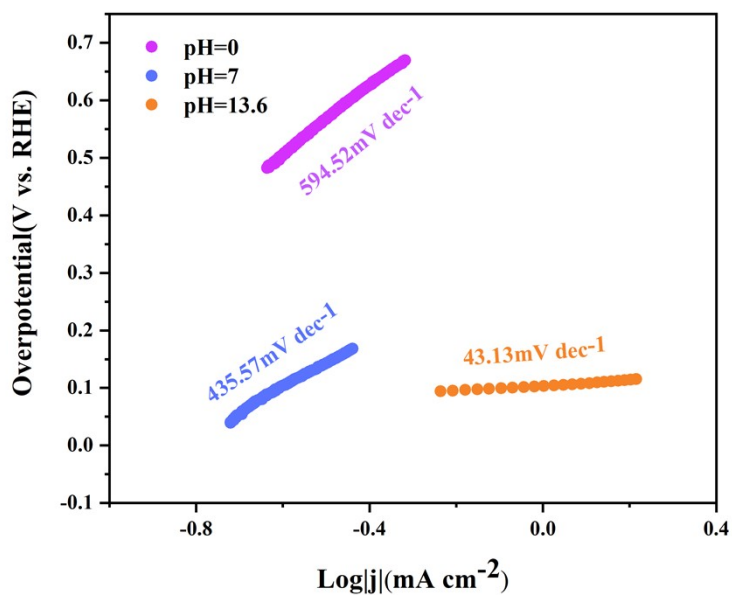

Figure S45 Tafel plots of different pH, measured during OER experiment in 0.5M KOH (pH = 13.6) electrolyte solution

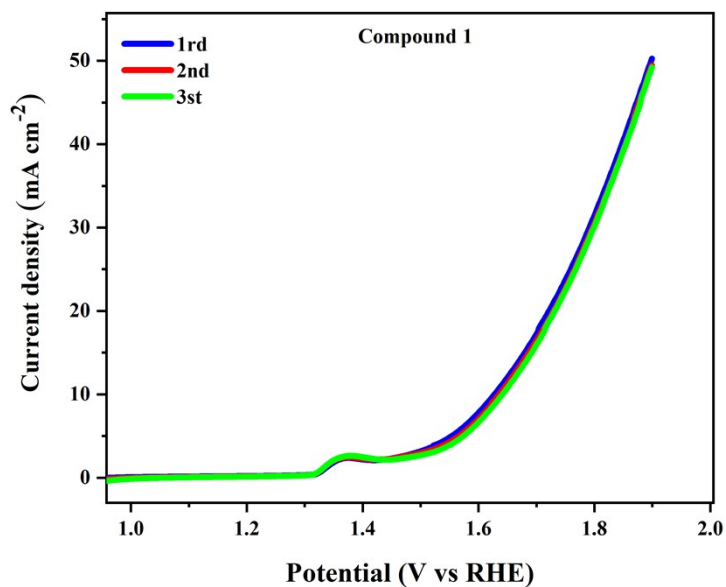

Figure S46 The three LSV curves of Compound 1 for OER test

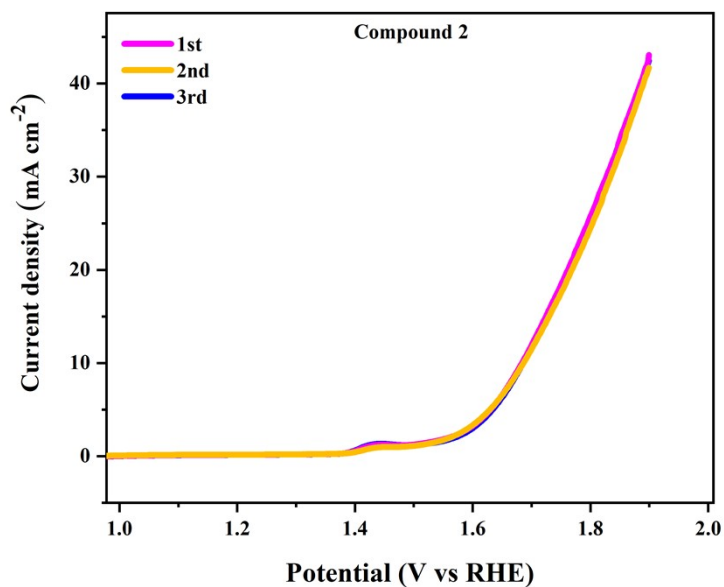

Figure S47 The three LSV curves of Compound 2 for OER test

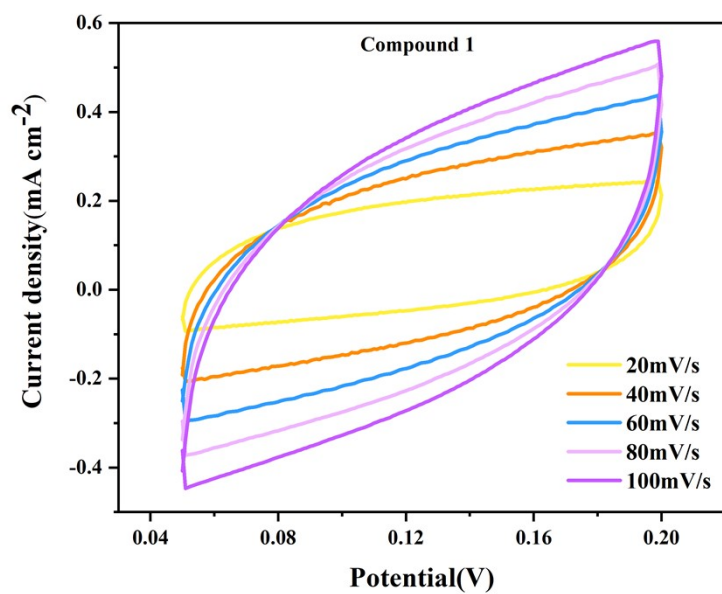

Figure S48 Cyclic voltammetry curves of Compound 1, measured during OER experiment in 0.5M KOH (pH = 13.6) electrolyte solution

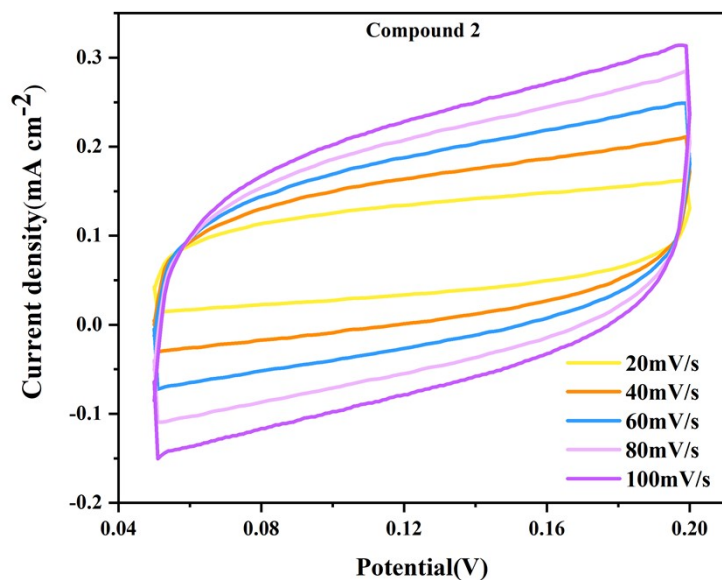

Figure S49 Cyclic voltammetry curves of Compound 2, measured during OER experiment in 0.5M KOH (pH = 13.6) electrolyte solution

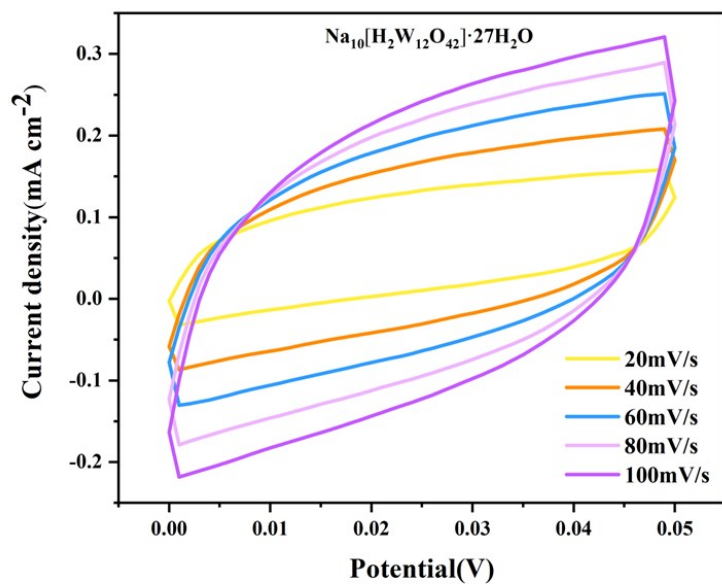

Figure S50 Cyclic voltammetry curves of Na<sub>10</sub>[H<sub>2</sub>W<sub>12</sub>O<sub>42</sub>]·27H<sub>2</sub>O, measured during OER experiment in 0.5M KOH (pH = 13.6) electrolyte solution

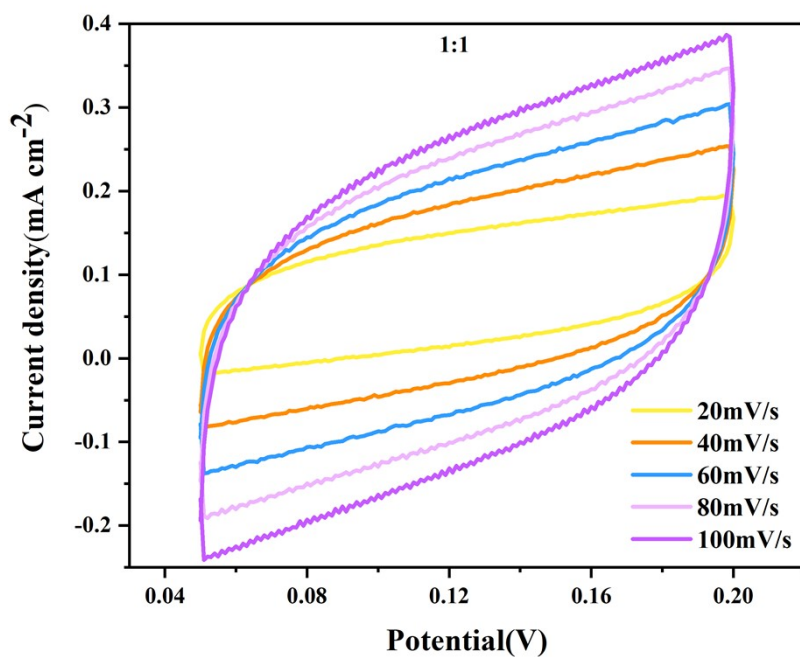

Figure S51 Cyclic voltammograms of the ratio of Compound 1 to carbon black is 1:1, measured during OER experiment in 0.5M KOH(pH = 13.6) electrolyte solution

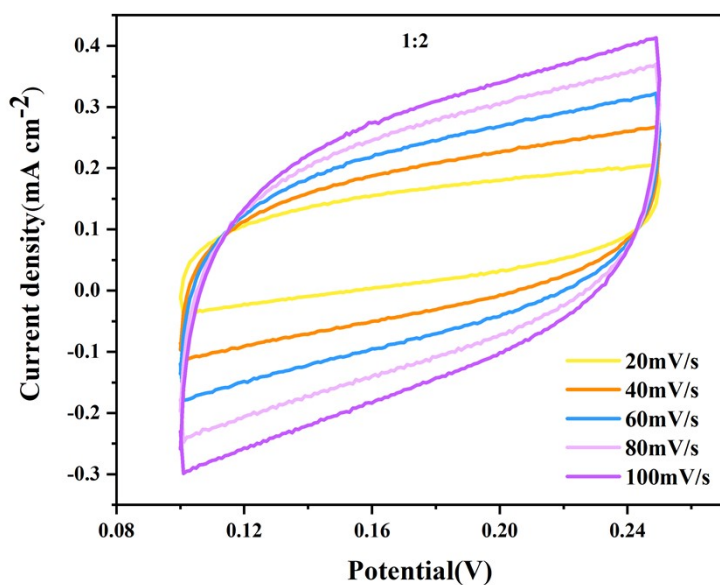

Figure S52 Cyclic voltammograms of the ratio of Compound 1 to carbon black is 1:2, measured during OER experiment in 0.5M KOH(pH = 13.6) electrolyte solution

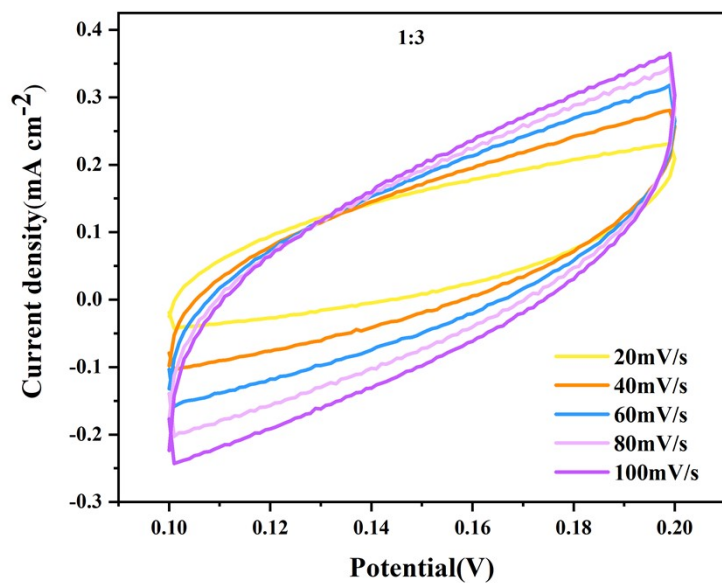

**Figure S53** Cyclic voltammetry curves of the ratio of Compound 1 to carbon black is 1:3, measured during OER experiment in 0.5M KOH(pH = 13.6) electrolyte solution

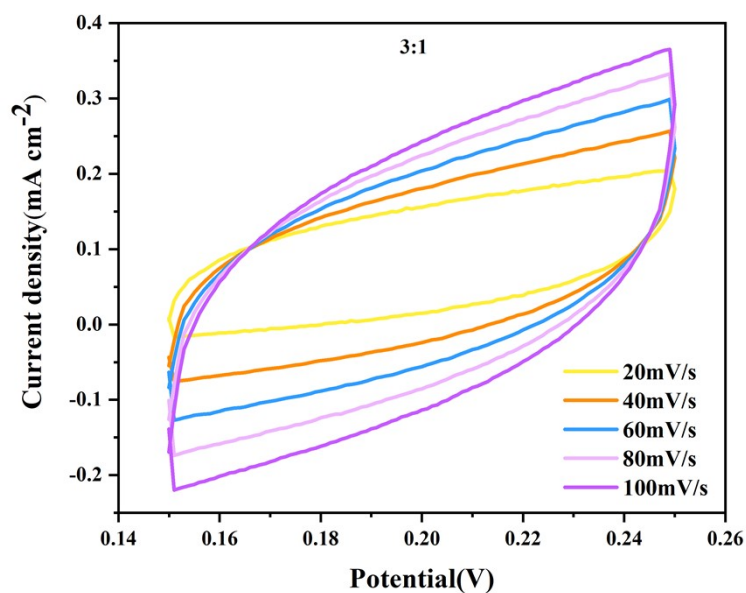

**Figure S54** Cyclic voltammetry curves of the ratio of Compound 1 to carbon black is 3:1; measured during OER experiment in 0.5M KOH(pH = 13.6) electrolyte solution

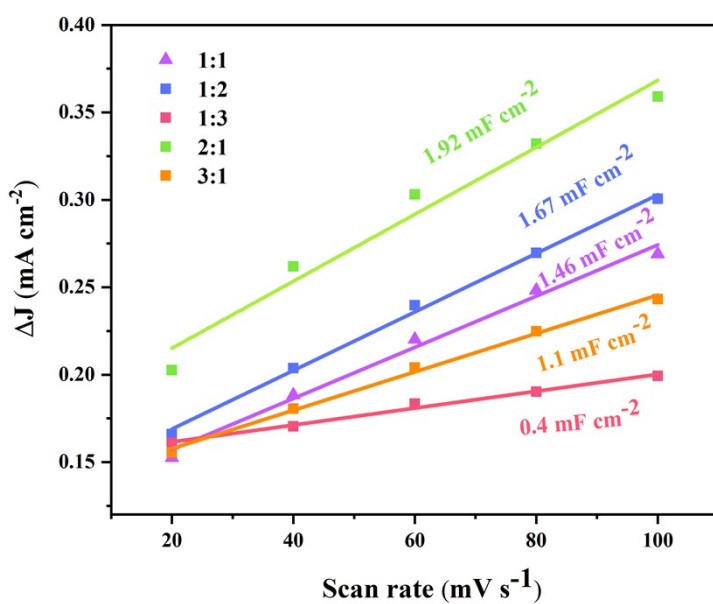

Figure S55 The Cdl of different active species / carbon black ratios measured during OER experiment

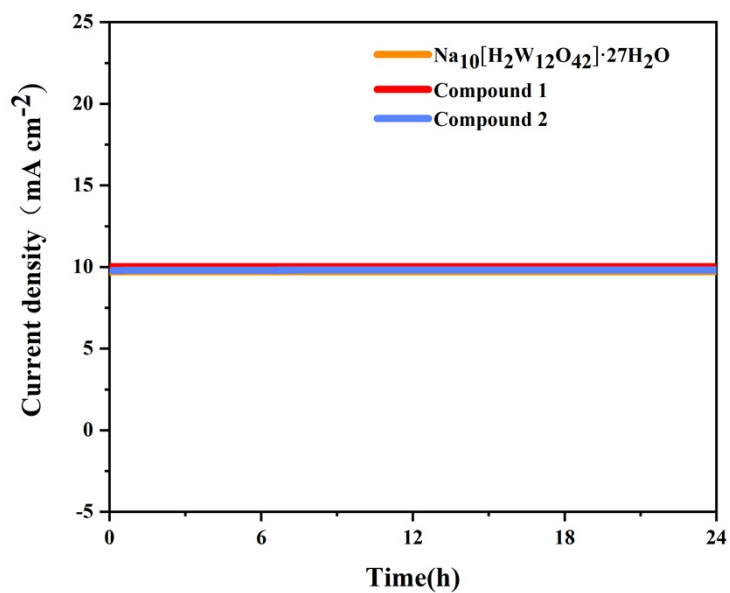

Figure S56 The chronoamperometry curve of different Compounds measured during OER experiment

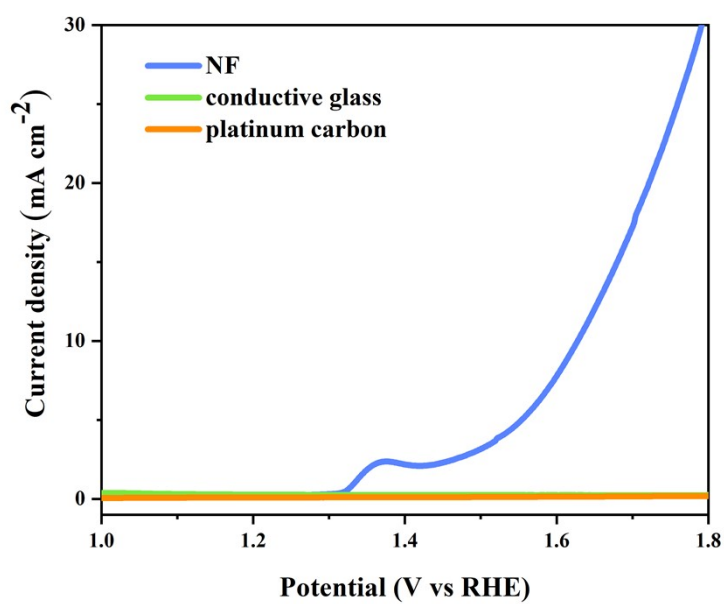

Figure S57 Polarization curves (LSV) of different fluid collectors(OER)

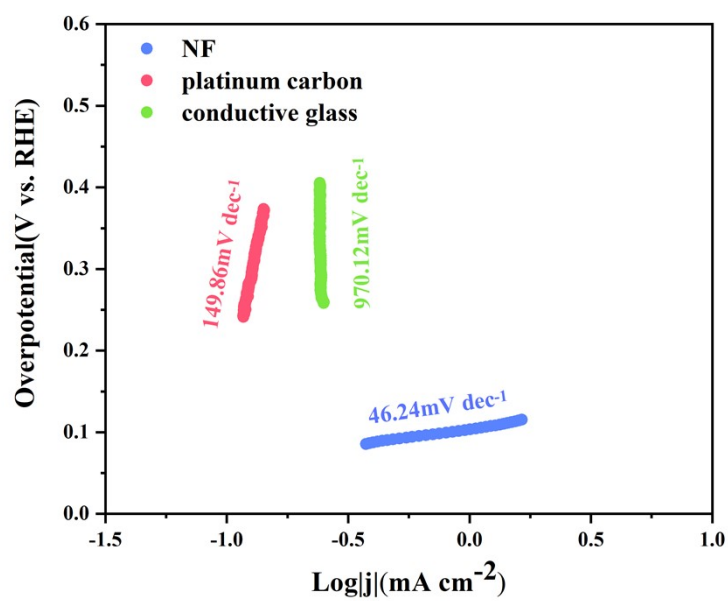

Figure S58 Tafel plots of different fluid collectors



**Table S6 Compare with some polyoxometalates in the literature for OER**

| <b>OER</b>                                                                                                                               |                                    |                                   |                                          | <b>Ref</b> |
|------------------------------------------------------------------------------------------------------------------------------------------|------------------------------------|-----------------------------------|------------------------------------------|------------|
| <b>Catalyst</b>                                                                                                                          | <b>Electrolyte</b>                 | <b><math>\eta_{10}</math>(mV)</b> | <b>Tafel slope (mV dec<sup>-1</sup>)</b> |            |
| CoP/C                                                                                                                                    | 0.1 M KOH                          | 360                               | —                                        | 8          |
| Mn <sub>3</sub> O <sub>4</sub> /CoSe <sub>2</sub>                                                                                        | 0.1 M KOH                          | 450                               | —                                        | 8          |
| CoC <sub>2</sub> O <sub>4</sub> ·2H <sub>2</sub> O                                                                                       | 0.1 M KOH                          | 436                               | —                                        | 8          |
| Ni-Co-LDH/Ni foam                                                                                                                        | 0.1 M KOH                          | 420                               | —                                        | 8          |
| FeNi@NC                                                                                                                                  | 1 M KOH                            | 390                               | 81                                       | 9          |
| NH <sub>4</sub> VO <sub>3</sub>                                                                                                          | 1 M KOH                            | 532                               | —                                        | 2          |
| H <sub>3</sub> BO <sub>3</sub>                                                                                                           | 1 M KOH                            | 702                               | —                                        | 2          |
| Na <sub>2</sub> B <sub>4</sub> O <sub>7</sub> ·10H <sub>2</sub> O                                                                        | 1 M KOH                            | 561                               | —                                        | 2          |
| Co <sub>2</sub> B-500                                                                                                                    | 1 M KOH                            | 380                               | 45                                       | 11         |
| NiPc-Ni                                                                                                                                  | 1 M KOH                            | 427                               | 83                                       | 12         |
| P <sub>1</sub> (PBA@POM(0.01g) )<br>(Polyoxometalate:H <sub>3</sub> PMo <sub>12</sub> O <sub>40</sub> )                                  | 1 M KOH                            | 580                               | 55.69                                    | 13         |
| P <sub>2</sub> (PBA@POM(0.1g) )<br>(Polyoxometalate:H <sub>3</sub> PMo <sub>12</sub> O <sub>40</sub> )                                   | 1 M KOH                            | 560                               | 44.21                                    | 13         |
| P <sub>3</sub> (PBA@POM(1g))<br>(Polyoxometalate: H <sub>3</sub> PMo <sub>12</sub> O <sub>40</sub> )                                     | 1 M KOH                            | 440                               | 23.45                                    | 13         |
| P <sub>4</sub> (PBA@POM(2g))<br>(Polyoxometalate: H <sub>3</sub> PMo <sub>12</sub> O <sub>40</sub> )                                     | 1 M KOH                            | 540                               | 42.65                                    | 13         |
| SiW <sub>9</sub> Co <sub>3</sub> @ZIF-67                                                                                                 | 0.1 M KOH                          | 470                               | 113.6                                    | 14         |
| MnVO <sub>x</sub> @NrGO (1-400)                                                                                                          | 0.1 M KOH                          | 440                               | 286                                      | 15         |
| MnVO <sub>x</sub> @NrGO (1-900)                                                                                                          | 0.1 M KOH                          | 420                               | 271                                      | 15         |
| Fe-POM                                                                                                                                   | 1 M KOH                            | 434                               | 87                                       | 27         |
| Ni-{P <sub>4</sub> Mo <sub>6</sub> }                                                                                                     | 1 M KOH                            | 320                               | 67                                       | 28         |
| Ba <sub>14</sub> [{FeCo <sub>3</sub> (OH) <sub>3</sub> PO <sub>4</sub> } <sub>4</sub> (SiW <sub>9</sub> O <sub>34</sub> ) <sub>4</sub> ] | 1 M H <sub>2</sub> SO <sub>4</sub> | 398                               | —                                        | 29         |
| MnFe-oxide                                                                                                                               | 0.1 M KOH                          | 720                               | 80                                       | 24         |

|                                                                         |           |       |    |    |
|-------------------------------------------------------------------------|-----------|-------|----|----|
| MnFe <sub>2</sub> O <sub>4</sub>                                        | 0.1 M KOH | 582   | 71 | 25 |
| MnOx-10                                                                 | 1 M KOH   | 393   | 84 | 26 |
| POM@Ni-MOF                                                              | 1 M KOH   | 107.3 | 61 | 27 |
| ([PVIM][V-Co <sub>4</sub> ])<br>(Polyoxometalate: Co-WCo <sub>3</sub> ) | 1 M KOH   | 430   | —  | 36 |
| PW <sub>12</sub> @amZIF<br>(Polyoxometalate: PNiOW <sub>11</sub> )      | 1 M KOH   | 423   | 86 | 37 |

## 2.7 Summary of HER and OER performance for the work in this paper

**Table S7 Summary of HER and OER performance for the work in this paper**

| <b>HER</b>                                                                            |                                      |           |                                                                   |                                          |
|---------------------------------------------------------------------------------------|--------------------------------------|-----------|-------------------------------------------------------------------|------------------------------------------|
| <b>Catalyst</b>                                                                       | <b>Electrolyte</b>                   | <b>pH</b> | <b>Overpotential (<math>\eta</math>) at 10 mA cm<sup>-2</sup></b> | <b>Tafel slope (mV dec<sup>-1</sup>)</b> |
| Compound 1(2:1)                                                                       | 0.5 M H <sub>2</sub> SO <sub>4</sub> | 0         | 199                                                               | 63.95                                    |
| Compound 2                                                                            | 0.5 M H <sub>2</sub> SO <sub>4</sub> | 0         | 322                                                               | 78.86                                    |
| Na <sub>10</sub> [H <sub>2</sub> W <sub>12</sub> O <sub>42</sub> ]·27H <sub>2</sub> O | 0.5 M H <sub>2</sub> SO <sub>4</sub> | 0         | 440                                                               | 495.76                                   |
| Bare carbon cloth                                                                     | 0.5 M H <sub>2</sub> SO <sub>4</sub> | 0         | 552                                                               | 46.6                                     |
| Pt/C                                                                                  | 0.5 M H <sub>2</sub> SO <sub>4</sub> | 0         | 108                                                               | 66.7                                     |
| Compound 1(1:1)                                                                       | 0.5 M H <sub>2</sub> SO <sub>4</sub> | 0         | 271                                                               | 116.36                                   |
| Compound 1(1:2)                                                                       | 0.5 M H <sub>2</sub> SO <sub>4</sub> | 0         | 373                                                               | 133.45                                   |
| Compound 1(1:3)                                                                       | 0.5 M H <sub>2</sub> SO <sub>4</sub> | 0         | 412                                                               | 138                                      |
| Compound 1(3:1)                                                                       | 0.5 M H <sub>2</sub> SO <sub>4</sub> | 0         | 498                                                               | 184.52                                   |
| Compound 1(2:1)                                                                       | 1 M PBS                              | 7         | —                                                                 | 595.51                                   |
| Compound 1(2:1)                                                                       | 0.5 M KOH                            | 13.6      | —                                                                 | 187.01                                   |
| <b>OER</b>                                                                            |                                      |           |                                                                   |                                          |
| <b>Catalyst</b>                                                                       | <b>Electrolyte</b>                   | <b>pH</b> | <b>Overpotential (<math>\eta</math>) at 10 mA cm<sup>-2</sup></b> | <b>Tafel slope (mV dec<sup>-1</sup>)</b> |
| Compound 1(2:1)                                                                       | 0.5 M KOH                            | 13.6      | 398                                                               | 46.24                                    |
| Compound 2                                                                            | 0.5 M KOH                            | 13.6      | 447.4                                                             | 80.41                                    |
| Na <sub>10</sub> [H <sub>2</sub> W <sub>12</sub> O <sub>42</sub> ]·27H <sub>2</sub> O | 0.5 M KOH                            | 13.6      | 496.4                                                             | 81.09                                    |
| Bare NF                                                                               | 0.5 M KOH                            | 13.6      | 541.4                                                             | 85.92                                    |

|                  |                                      |      |       |        |
|------------------|--------------------------------------|------|-------|--------|
| RuO <sub>2</sub> | 0.5 M KOH                            | 13.6 | 314.4 | 132.26 |
| Compound 1(1:1)  | 0.5 M KOH                            | 13.6 | 436.4 | 137.85 |
| Compound 1(1:2)  | 0.5 M KOH                            | 13.6 | 443   | 134.36 |
| Compound 1(1:3)  | 0.5 M KOH                            | 13.6 | 417.4 | 111.19 |
| Compound 1(3:1)  | 0.5 M KOH                            | 13.6 | 490.4 | 157.12 |
| Compound 1(2:1)  | 1 M PBS                              | 7    | —     | 435.57 |
| Compound 1(2:1)  | 0.5 M H <sub>2</sub> SO <sub>4</sub> | 0    | —     | 594.52 |

## 2.8 Determination of Turn Over Frequency (TOF)

The exhaust method is used to obtain the yield of H<sub>2</sub> and O<sub>2</sub>, and the relevant content for determining the content of H<sub>2</sub> and O<sub>2</sub>.

The TOF value for HER and OER experiments can be calculated as described equation

$$TOF = \frac{j N_A}{Fn\Gamma}$$

Where,

$j$  = current density (mA cm<sup>-2</sup>),  $N_A$  = Avogadro constant ( $6.0221 \times 10^{23}$ ) mol<sup>-1</sup>,  $n$  is the number of electrons transferred = 2,  $\Gamma$  is the surface or total concentration of catalyst in terms of number of atoms.

Surface area of carbon cloth = 2cm<sup>2</sup>

Molar mass of Na<sub>12</sub>H<sub>6</sub>[Mn<sub>2</sub>W<sub>12</sub>O<sub>43</sub>(H<sub>2</sub>O)<sub>8</sub>(OH)<sub>8</sub>] · 8H<sub>2</sub>O = 3694.08g

Mass contribution of Mn atoms in 1 mole Na<sub>12</sub>H<sub>6</sub>[Mn<sub>2</sub>W<sub>12</sub>O<sub>43</sub>(H<sub>2</sub>O)<sub>8</sub>(OH)<sub>8</sub>] · 8H<sub>2</sub>O = 110g

Mass loading of Na<sub>12</sub>H<sub>6</sub>[Mn<sub>2</sub>W<sub>12</sub>O<sub>43</sub>(H<sub>2</sub>O)<sub>8</sub>(OH)<sub>8</sub>] · 8H<sub>2</sub>O on carbon cloth = (2/3) × 5mg = 3.33mg = 3.33 × 10<sup>-3</sup>g

Molar mass of Mn = 55 g mole<sup>-1</sup>

Mass of Mn loading on carbon cloth = {(110 × 3.33 × 10<sup>-3</sup>)/3694.08}g = 1 × 10<sup>-4</sup>g = (1 × 10<sup>-4</sup>g)/(55 g mole<sup>-1</sup>) = 1.7 × 10<sup>-6</sup> mole

Number of Mn atoms present on carbon cloth = 1.7 × 10<sup>-6</sup> mole = 1.7 × 10<sup>-6</sup> × 6.0221 × 10<sup>23</sup> = 1.02 × 10<sup>18</sup>

Surface concentration ( $\Gamma$ ): (1.02 × 10<sup>18</sup>/surface area of carbon cloth) = 5.12 × 10<sup>17</sup>

TOF value for HER:

$$TOF = \frac{j N_A}{Fn\Gamma} = \frac{10 \times 10^{-3} \text{ cm}^{-2} \times (6.0221 \times 10^{23} \text{ atoms mol}^{-1})}{96485 \text{ s mol}^{-1} \times 2 \times (5.12 \times 10^{17} \text{ atoms cm}^{-2})} = 0.061 \text{ s}^{-1}$$

TOF value for OER experiment at overpotential of 360 mV (1.59 V vs. RHE):

$$TOF = \frac{j N_A}{F n \Gamma} = \frac{10 \times 10^{-3} \text{cm}^{-2} \times (6.0221 \times 10^{23} \text{atoms mol}^{-1})}{96485 \text{ s mol}^{-1} \times 4 \times (5.12 \times 10^{17} \text{atoms cm}^{-2})} = 0.0305 \text{s}^{-1}$$

**Table S8 Theoretical and experimental values of decomposed water and FE**

| <b>H<sub>2</sub> yield(mL)</b> |                                 |                                  |        |
|--------------------------------|---------------------------------|----------------------------------|--------|
| Time(s)                        | Theoretical H <sub>2</sub> (mL) | Experimental H <sub>2</sub> (mL) | FE (%) |
| 120                            | 7.3                             | 7                                | 96     |
| 150                            | 9.15                            | 9                                | 98     |
| 180                            | 10.97                           | 11                               | 100    |
| 210                            | 12.81                           | 12.5                             | 98     |
| 240                            | 14.6                            | 14.5                             | 99     |
| 270                            | 16.47                           | 16                               | 97     |
| 300                            | 18.2                            | 18                               | 99     |
| 330                            | 20.13                           | 20                               | 99     |
| <b>O<sub>2</sub> yield(mL)</b> |                                 |                                  |        |
| Time(s)                        | Theoretical O <sub>2</sub> (mL) | Experimental O <sub>2</sub> (mL) | FE (%) |
| 120                            | 3.6                             | 3.5                              | 97     |
| 150                            | 4.5                             | 4.5                              | 100    |
| 180                            | 5.5                             | 5.5                              | 100    |
| 210                            | 6.4                             | 6.5                              | 100    |
| 240                            | 7.3                             | 7                                | 96     |
| 270                            | 8.2                             | 8                                | 98     |
| 300                            | 9.1                             | 9                                | 99     |
| 330                            | 10                              | 10                               | 100    |

### 3 REFERENCES

- S1** Jun-Sheng Qin, Dong-Ying Du, Wei Guan, Xiang-Jie Bo, Ya-Fei Li, Li-Ping Guo, Zhong-Min Su, Yuan-Yuan Wang, Ya-Qian Lan, Hong-Cai Zhou; Ultrastable Polymolybdate-Based Metal–Organic Frameworks as Highly Active Electrocatalysts for Hydrogen Generation from Water. *Journal of the American Chemical Society*, 2015, 137, 22: 7169-7177.
- S2** Tanmay Rom, Rathindranath Biswas, Krishna Kanta Haldar, Uttam Saha, c Sudhindra Rayaprol, d and Avijit Kumar Paul, Vanadate Encapsulated Polyoxoborate Framework with [V<sub>12</sub>B<sub>18</sub>] Cluster: An Efficient Bifunctional Electrocatalyst for Oxygen and Hydrogen Evolution Reactions. *Crystal Growth & Design*, 2022, 22: 4666-4672.
- S3** Jebaslinhepzybai B T, Samaraj E, Kesavan T, et al. Enhanced electrocatalytic activity of in situ carbon encapsulated molybdenum phosphide derived from a hybrid POM for the HER over a wide pH range[J]. *Sustainable Energy & Fuels*, 2022, 6(2): 289-298.
- S4** Tang Y J, Chen Y, Zhu H J, et al. Solid-phase hot-pressing synthesis of POMOFs on carbon cloth and derived phosphides for all pH value hydrogen evolution[J]. *Journal of Materials Chemistry A*, 2018, 6(44): 21969-21977.
- S5** Shekurov, R. et. al. Zn and Co Redox Active Coordination Polymers as Efficient Electrocatalyst, *Dalton Trans.* 2019, 48: 3601-3609.
- S6** Zhou, B.; Zheng, J.; Duan, J.; Hou, C.; Wang, Y.; Jin, W.; Xu, Q. Chemically Robust, Cu-based Porous Coordination Polymer Nanosheets for Efficient Hydrogen Evolution: Experimental and Theoretical Studies. *ACS Appl. Mater. Interfaces* 2019, 11: 21086-21093.
- S7** Chakraborty, D.; Chowdhury, A.; Chandra, M.; Jana, R.; Shyamal, S.; Bhunia, M. K.; Chandra, D.; Hara, M.; Pradhan, D.; Datta, A.; Bhaumik, A. Novel Tetradentate Phosphonate Ligand Based Bioinspired Co Metal–Organic Frameworks: Robust Electrocatalyst for the Hydrogen Evolution Reaction in Different Mediums. *Cryst. Growth Des.* 2021, 21: 2614-2623.
- S8** Wenjing Luo, Jun Hu , Hongling Diao, Benjamin Schwarz, Carsten Streb, and Yu-Fei Song; Robust Polyoxometalate/Nickel Foam Composite Electrodes for Sustained Electrochemical Oxygen Evolution at High pH. *Communication*, 2017, 56, 18: 4941-4944.
- S9** Zhongyuan Yu, Tong Lin, Chunfeng Zhu, Jintang Li, and Xuetao Luo; Design of Trimetallic NiMoFe Hollow Microspheres with Polyoxometalate-Based Metal-Organic Frameworks for Enhanced Oxygen Evolution Reaction. *ChemElectroChem*, 2021, 8: 1316-1321.
- S10** Rom, T.; Biswas, R.; Haldar, K. K.; Sarkar, S.; Saha, U.; Paul, A. K. Charge Separated OneDimensional Hybrid Cobalt/Nickel Phosphonate Frameworks: A Facile Approach to Design Bifunctional Electrocatalyst for Oxygen Evolution and Hydrogen Evolution Reactions. *Inorg. Chem.* 2021, 60: 15106-15111.
- S11** Masa, J.; Weide, P.; Peeters, D.; Sinev, I.; Xia, W.; Sun, Z.; Somsen, C.; Muhler, M.; Schuhmann, W. Amorphous Cobalt Boride (Co<sub>2</sub>B) as a Highly Efficient Nonprecious Catalyst for Electrochemical Water Splitting: Oxygen and Hydrogen Evolution. *Adv. Energy Mater.* 2016, 6: 1502313.
- S12** Li, J.; Liu, P.; Mao, J.; Yan, J.; Song, W. Two-Dimensional Conductive Metal-Organic Frameworks with Dual Metal Sites Toward Electrochemical Oxygen Evolution Reaction. *J. Mater. Chem. A* 2021, 9: 1623-1629.
- S13** Wang Y, Wang Y, Zhang L, et al. PBA@POM hybrids as efficient electrocatalysts for the oxygen evolution reaction. *Chemistry–An Asian Journal*, 2019, 14(16): 2790-2795.

- S14** Abdelkader-Fernandez V K, Fernandes D M, Balula S S, et al. Oxygen evolution reaction electrocatalytic improvement in POM@ZIF nanocomposites: a bidirectional synergistic effect. *ACS Applied Energy Materials*, 2020, 3(3): 2925-2934.
- S15** Xing, X.; Liu, R.; Cao, K.; Kaiser, U.; Zhang, G.; Streb, C. Manganese Vanadium Oxide–N-doped Reduced Graphene Oxide Composites as Oxygen Reduction and Oxygen Evolution Electrocatalysts. *ACS Appl. Mater. Interfaces* 2018, 10: 44511-44517.
- S16** Ahmad W, Gao Q, Zhang X L, et al. Sandwich-Type Polyoxometalate Mediates Cobalt Diselenide for Hydrogen Evolution in Acidic Electrolyte. *ChemNanoMat*, 2020, 6(8): 1164-1168.
- S17** Hou Y, Pang H, Zhang L, et al. Highly dispersive bimetallic sulfides afforded by crystalline polyoxometalate-based coordination polymer precursors for efficient hydrogen evolution reaction. *Journal of Power Sources*, 2020, 446: 227319.
- S18** Mitchell G. S. da Silva, Celisnolia M. Leite, Marco A. L. Cordeiro, Valmor R. Mastelaro, and Edson R. Leite; One-Step Synthesis of Nickel Sulfides and Their Electrocatalytic Activities for Hydrogen Evolution Reaction: A Case Study of Crystalline h-NiS and o-Ni<sub>9</sub>S<sub>8</sub> Nanoparticles. *ACS Applied Energy Materials*, 2020, 3, 10: 9498-9503.
- S19** Jadranka M, Filipe G, Sara K, Nemanja G, Anup P, Diogo M. F. S and Biljana Š; Transition Metal-Based Polyoxometalates for Oxygen Electrode Bifunctional Electrocatalysis. *Batteries*, 2024, 10(6), 197.
- S20** Yajie L, Na Z, Zhixuan S, Xiaoli H, Zhiyu D and Zhongmin S; An hourglass-shaped nickel-based polyoxometalate crystalline material as a highly efficient bifunctional electrocatalyst for the oxygen evolution reaction and detection of H<sub>2</sub>O<sub>2</sub>. *Inorganic Chemistry Frontiers*, 2024, 11, 2598-2607.
- S21** Xin-Bao H, Dong-Xue W, Eduardo G, Yu-Hui Luo d, Yuan-Zhi T, Dong-Fei L, Yang-Guang L, Thomas W, En-Bo W, Lan-Sun Z; Fe-substituted cobalt-phosphate polyoxometalates as enhanced oxygen evolution catalysts in acidic media. *Chinese Journal of Catalysis*, 2020, 41, 5, 853-857.
- S22** Ali H I, Reza O, Jahan-Bakhsh R; Novel polyoxometalate-based composite as efficient electrocatalyst for alkaline water oxidation reaction. *Journal of the Iranian Chemical Society*, 2021, 18, 2079-2089.
- S23** Huang Y, Ma Z, Hu Y, Chai D, Qiu Y, Gao G, Hu P; An efficient WSe<sub>2</sub>/Co<sub>0.85</sub>Se/graphene hybrid catalyst for electrochemical hydrogen evolution reaction. *RSC Advances*, 2016, 6 (57), 51725–51731.
- S24** Nimai B, Pravin P. I, Suddhasatwa B; Electrosynthesis of Mn-Fe oxide nanopetals on carbon paper as bi-functional electrocatalyst for oxygen reduction and oxygen evolution reaction. *International Journal of Hydrogen Energy*, 2018, 43, 6, 3165-3171.
- S25** Conghui S., Yelong Z., Changqin Z., Hui G., Wensheng M., Lanfen L., Zhonghua Z.; Mesoporous nanostructured spinel-type MFe<sub>2</sub>O<sub>4</sub> (M = Co, Mn, Ni) oxides as efficient bi-functional electrocatalysts towards oxygen reduction and oxygen evolution. *Electrochimica Acta*, 2017, 245, 829-838.
- S26** Carsten W, Dr. P W. M, Dr. S L, Prof. Dr. H D, Prof. Dr. M D; Facile Formation of Nanostructured Manganese Oxide Films as High-Performance Catalysts for the Oxygen Evolution Reaction. *ChemSusChem*, 2018, 11, 15, 2554-2561.
- S27** Hongtao C., Lige G., Jihua W., Limin D., Jingyu Z., Yitong M., Binghe Y., Meijia W., Yunhao G., Hui L.; POM@TM-MOFs prism-structures as a superior bifunctional electrocatalyst for overall water splitting. *Journal of Solid State Chemistry*, 2024, 331, 124550.
- S28** Linghao H., Shunjiang H., Yongkang L., Minghua W., Bingbing C., Shide W., Jiameng L., Zhihong Z., Miao D.; Multicomponent Co<sub>9</sub>S<sub>8</sub>@MoS<sub>2</sub> nanohybrids as a novel trifunctional electrocatalyst for efficient methanol electrooxidation and overall water splitting. *Journal of Colloid and Interface Science*, 2021, 586, 538-550.



- S29** Jagadis G., Yi L., Jie G., Zhiyuan M., Bipeen D., Aadil Nabi C., Lubin N., Guowang D., Yongge W.; Three-Dimensional Nano Assembly of Nickel Cobalt Sulphide/Polyaniline@Polyoxometalate/Reduced Graphene Oxide Hybrid with Superior Lithium Storage and Electrocatalytic Properties for Hydrogen Evolution Reaction. *Journal of Colloid and Interface Science*, 2022, 614, 642-654.
- S30** Cheolmin L., Dasom J., Jehee P., Wonsuk L., Jaehyun P., Seok Ju K., Youngsik K., Jungki R.; Tetraruthenium Polyoxometalate as an Atom-Efficient Bifunctional Oxygen Evolution Reaction/Oxygen Reduction Reaction Catalyst and Its Application in Seawater Batteries. *ACS Applied Materials & Interfaces*, 2020, 12(29), 32689-32697.
- S31** Yukun L., Changle Y., Yaping L., Wenjing B., Xinxin G., Wenfeng Y., Zhi L., Ping J., Wenfu Y., Shoujie L., Yuan P., Yunqi L.; Atomically dispersed Ni on Mo<sub>2</sub>C embedded in N, P co-doped carbon derived from polyoxometalate supramolecule for high-efficiency hydrogen evolution electrocatalysis. *Applied Catalysis B: Environment and Energy*, 2021, 296, 5, 120336.
- S32** Jing J., Qiuxia L., Chunmei Z., Lunhong A.; Cobalt/molybdenum carbide@ N-doped carbon as a bifunctional electrocatalyst for hydrogen and oxygen evolution reactions. *Journal of Materials Chemistry A*, 2017, 5, 16929-16935.
- S33** Xiaobin X., Farhat N., Xun W.; Ni-decorated molybdenum carbide hollow structure derived from carbon-coated metal-organic framework for electrocatalytic hydrogen evolution reaction. *Chemistry of Materials*, 2016, 28, 17, 6313-6320.
- S34** Jiao D., Wentao Y., Pengju R., Yong W., Dehui D., Ze Zh., Xinhe B.; High performance hydrogen evolution electrocatalysis by layer-controlled MoS<sub>2</sub> nanosheets. *RSC Advances*, 2014, 4, 34733-34738.
- S35** Zheng H., Zhuxian Y., Quanli J., Nannan W., Yanqiu Z., Yongde X.; Bimetallic Co-Mo sulfide/carbon composites derived from polyoxometalate encapsulated polydopamine-decorated ZIF nanocubes for efficient hydrogen and oxygen evolution. *Nanoscale*, 2022, 14, 4726-4739.
- S36** Ganga S., Subhasis D A., Debaprasad M.; Stabilization and Activation of Polyoxometalate over Poly(Vinyl Butylimidazolium) Cations towards Electrocatalytic Water Oxidation in Alkaline Media. *Chemical Communications*, 2023, 59, 4774-4777.
- S37** Yupeng Z., Dandan G., Johannes B., Ute K., Rongji L., Carsten S.; Polyoxometalate-Assisted Synthesis of Amorphous Zeolitic Imidazolate for Efficient Electrocatalytic Oxygen Evolution. *Results in Chemistry*, 2022, 4, 100568.
